# Supplementary material
Source: PubMed Central journal article supplement (PMC10170340)
Supplement: jama-e235355-s003.pdf [file jama-e235355-s003.pdf]

## Supplemental Online Content

Maheer TM, Ford P, Brown KK, et al; for the ISABELA 1 and 2 investigators. Ziritaxestat, a novel autotaxin inhibitor, and lung function in idiopathic pulmonary fibrosis: the ISABELA 1 and 2 randomized clinical trials. *JAMA*. Published May 9, 2023. doi:10.1001/jama.2023.5355

**eFigure 1.** Number of patients in each country participating in ISABELA 1 and 2

**eFigure 2.** Time to disease progression (composite endpoint of first occurrence of  $\geq 10\%$  absolute decline in percent predicted FVC or all-cause mortality) in ISABELA 1 (a), ISABELA 2 (b) and ISABELA 1 and 2 combined (c)

**eFigure 3.** Time to first adjudicated respiratory-related hospitalization for ISABELA 1 (a), ISABELA 2 (b) and ISABELA 1 and 2 combined (c)

**eFigure 4.** Time to respiratory-related mortality in ISABELA 1 (a) and ISABELA 2 (b) (adjudicated)

**eFigure 5.** Time to all-cause mortality or respiratory-related hospitalization (adjudicated) for ISABELA 1 (a), ISABELA 2 (b) and ISABELA 1 and 2 combined (c)

**eFigure 6.** Time to first acute IPF exacerbation (adjudicated) in ISABELA 1 (a) and ISABELA 2 (b)

**eFigure 7.** Mean change from baseline in FVC over time for ISABELA 1 and 2 combined

**eFigure 8.** Change from baseline in FVC in the pirfenidone (a), nintedanib (b) and neither (c) stratum of ISABELA 1

**eFigure 9.** Change from baseline in FVC in the pirfenidone (a), nintedanib (b) and neither (c) stratum of ISABELA 2

**eFigure 10.** Two responder phenotypes in the population of ISABELA 1 (a), ISABELA 2 (b) and ISABELA 1 and 2 combined (c)

### eMethods

#### List of investigators who randomized patients to the studies

**eTable 1.** Baseline demographics and disease characteristics by strata

**eTable 2.** Duration of treatment and exposure (until the end of the studies)

**eTable 3.** Doses of standard of care during the study period

**eTable 4.** Number of patients who switched standard of care (until the end of the studies)

**eTable 5.** Primary cause of adjudicated all-cause hospitalization

**eTable 6.** Change from baseline at Week 52 in efficacy endpoints

**eTable 7.** Adjudicated all-cause mortality events in ISABELA 1 and 2

**eTable 8.** Treatment-emergent adverse events and dose reductions/interruptions/discontinuations according to stratum in ISABELA 1 and 2

**eTable 9.** Treatment-emergent adverse events with a  $\geq 5\%$  incidence in at least one treatment group in ISABELA 1 and 2

**eTable 10.** Treatment-emergent adverse events leading to death in ISABELA 1 and 2

**eTable 11.** Summary of adverse events leading to deaths

**eTable 12.** Treatment-emergent adverse events related to COVID-19 infections and suspected infections in ISABELA 1 and 2

**eTable 13.** Impact of COVID-19 on study visits

**eTable 14.** Model-derived ziritaxestat pharmacokinetic parameters in ISABELA 1 and 2

## **eReferences**

This supplemental material has been provided by the authors to give readers additional information about their work.

**eFigure 1.** Number of patients in each country participating in ISABELA 1 and 2

|                         | Number of patients |            |
|-------------------------|--------------------|------------|
|                         | ISABELA 1          | ISABELA 2  |
| <b>Asia-Pacific</b>     |                    |            |
| Australia               | 51                 | 0          |
| Japan                   | 3                  | 121        |
| Korea (Republic of)     | 0                  | 76         |
| New Zealand             | 0                  | 17         |
| Taiwan                  | 21                 | 0          |
| <b>Total</b>            | <b>75</b>          | <b>214</b> |
| <b>EMEA</b>             |                    |            |
| Belgium                 | 27                 | 0          |
| Czech Republic          | 16                 | 0          |
| Denmark                 | 28                 | 0          |
| France                  | 0                  | 21         |
| Germany                 | 41                 | 33         |
| Greece                  | 15                 | 0          |
| Hungary                 | 0                  | 12         |
| Israel                  | 0                  | 64         |
| Italy                   | 0                  | 31         |
| Netherlands             | 0                  | 64         |
| Poland                  | 0                  | 31         |
| South Africa            | 0                  | 20         |
| Spain                   | 39                 | 0          |
| Turkey                  | 24                 | 0          |
| United Kingdom          | 30                 | 0          |
| <b>Total</b>            | <b>220</b>         | <b>276</b> |
| <b>Latin America</b>    |                    |            |
| Argentina               | 0                  | 59         |
| Chile                   | 57                 | 0          |
| Mexico                  | 0                  | 31         |
| Peru                    | 21                 | 0          |
| <b>Total</b>            | <b>78</b>          | <b>90</b>  |
| <b>Northern America</b> |                    |            |
| Canada                  | 0                  | 32         |
| United States           | 150                | 165        |
| <b>Total</b>            | <b>150</b>         | <b>197</b> |

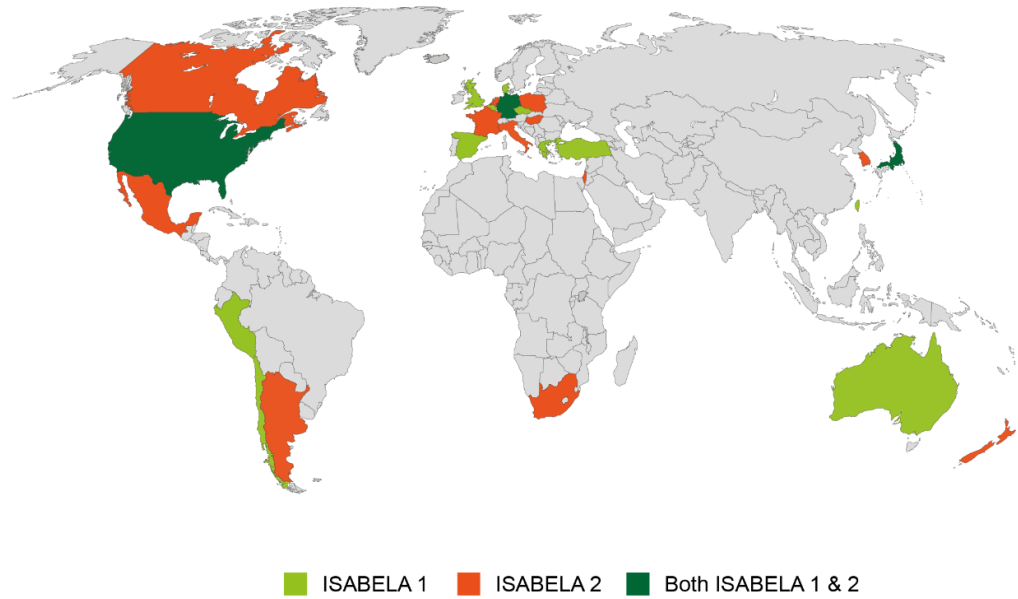

**eFigure 2.** Time to disease progression (composite endpoint of first occurrence of  $\geq 10\%$  absolute decline in percent predicted FVC or all-cause mortality) in ISABELA 1 (a), ISABELA 2 (b) and ISABELA 1 and 2 combined (c)

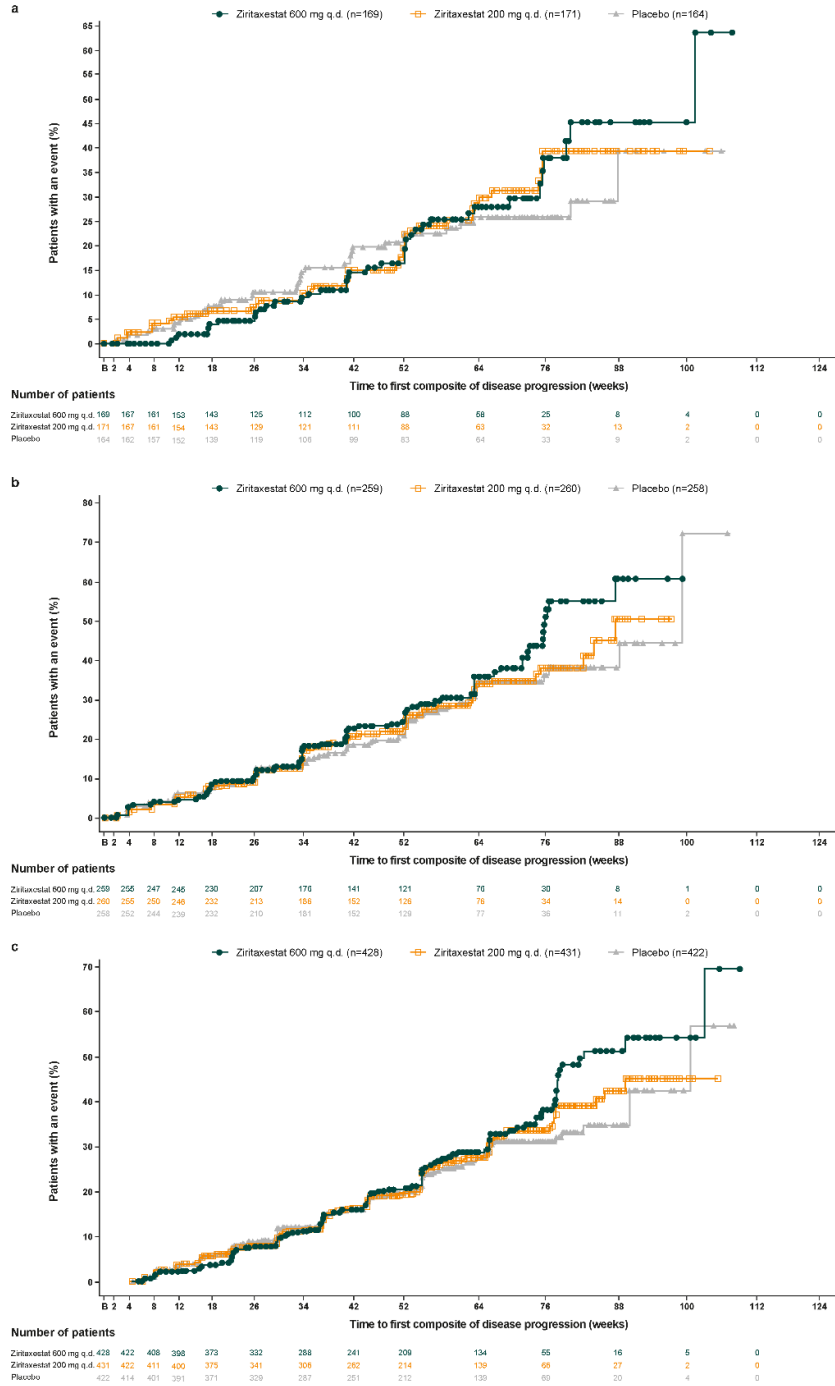

Full analysis set.

Disease progression: composite endpoint of first occurrence of  $\geq 10\%$  absolute decline in percent predicted FVC or all-cause mortality at Week 52.

B, baseline; FVC, forced vital capacity; q.d., once daily.

**eFigure 3.** Time to first adjudicated respiratory-related hospitalization for ISABELA 1 (a), ISABELA 2 (b) and ISABELA 1 and 2 combined (c)

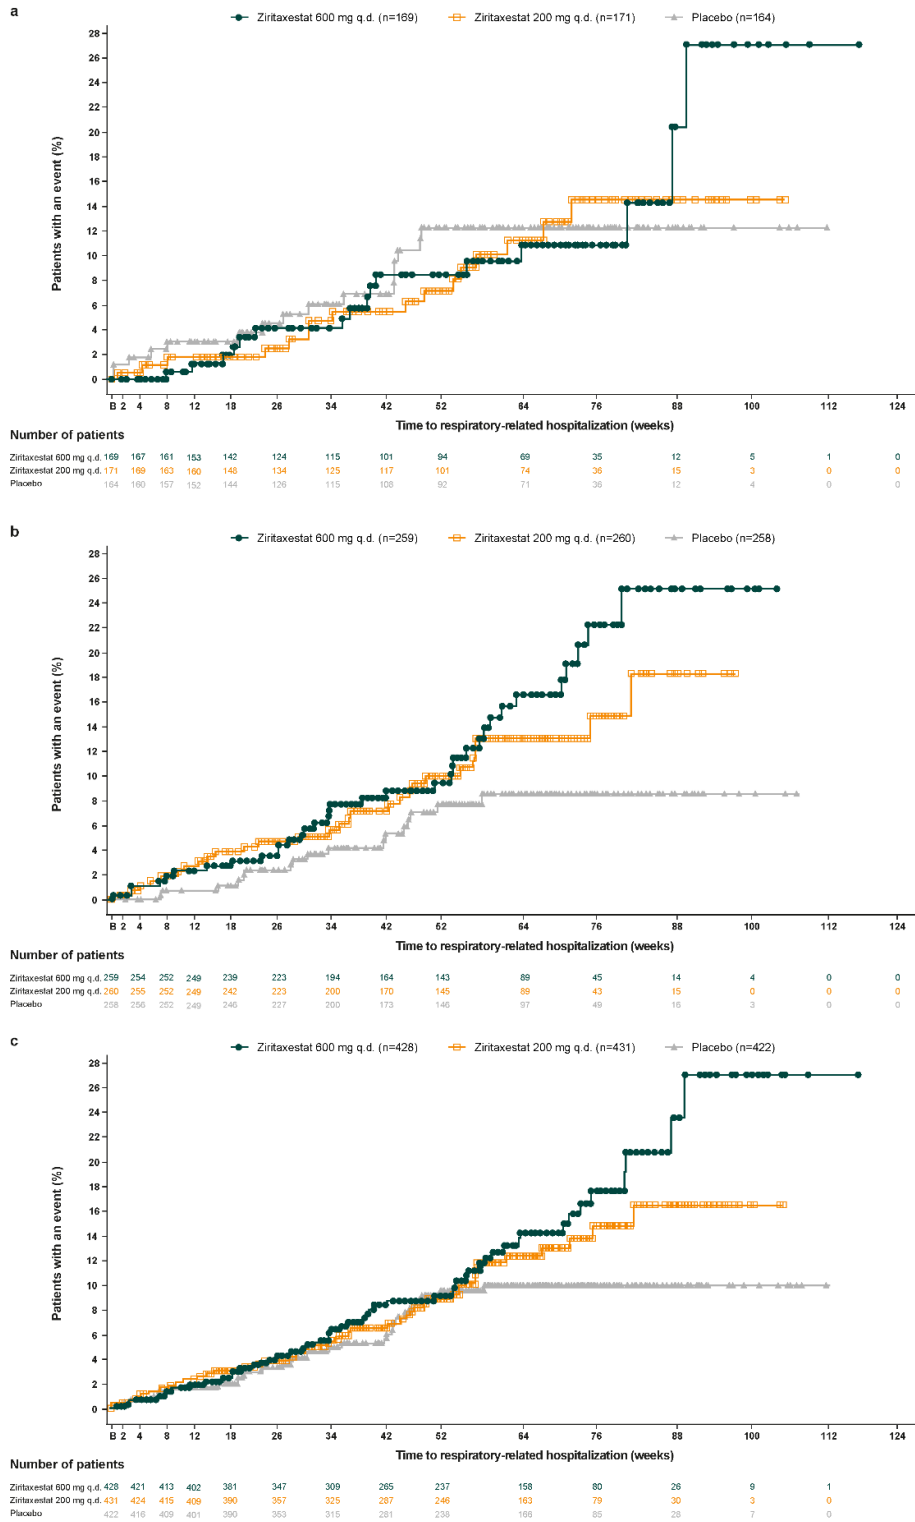

Full analysis set.  
B, baseline; q.d., once daily.

**eFigure 4.** Time to respiratory-related mortality in ISABELA 1 (a) and ISABELA 2 (b) (adjudicated)

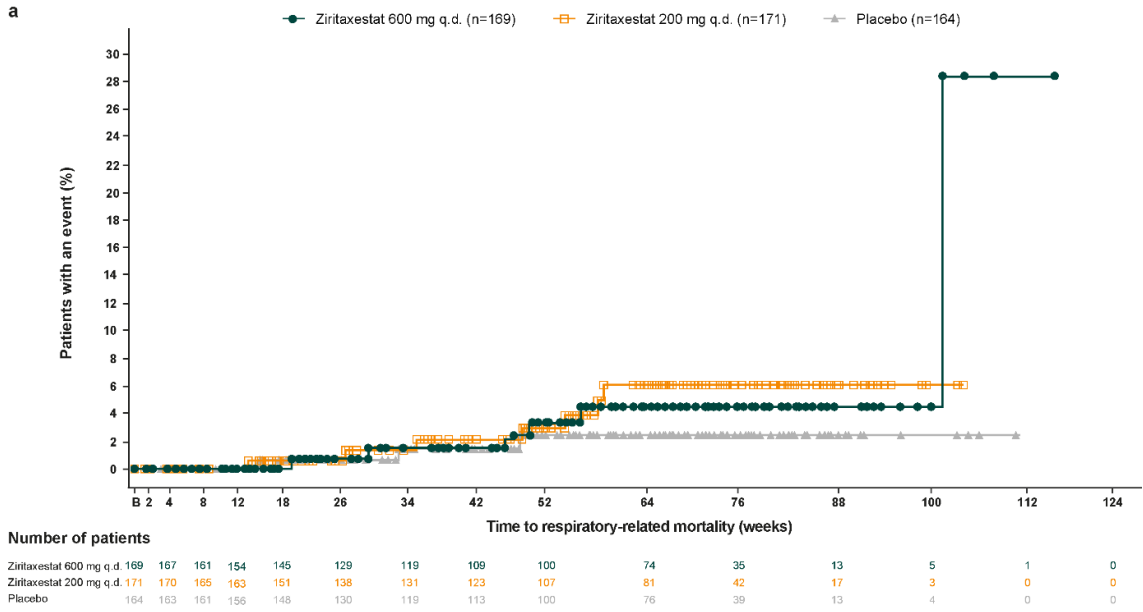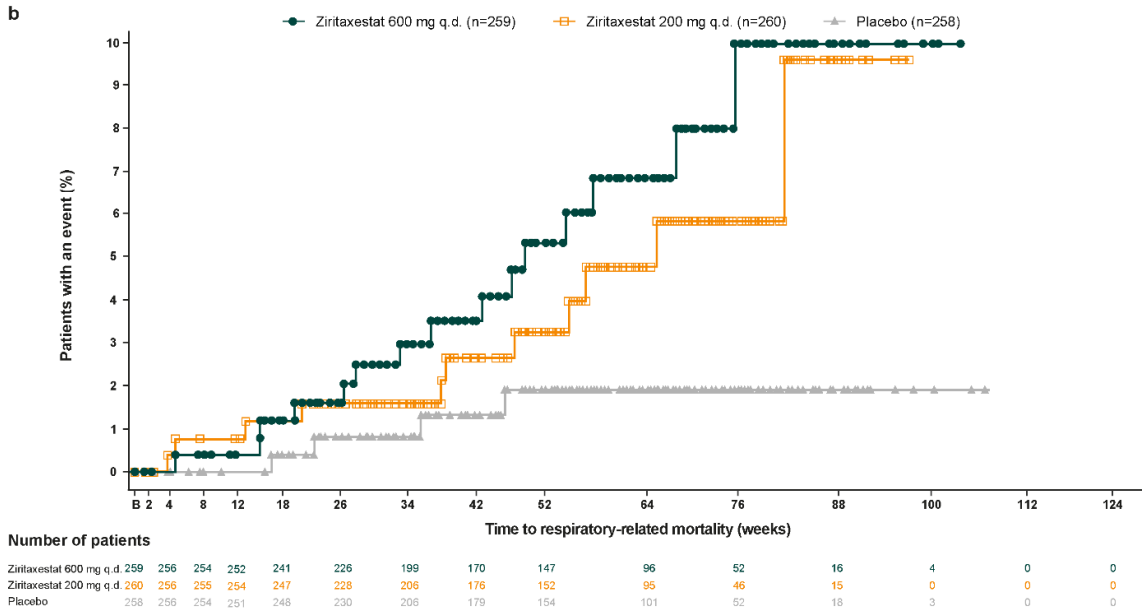

Full analysis set.  
B, baseline; q.d., once daily.

**eFigure 5.** Time to all-cause mortality or respiratory-related hospitalization (adjudicated) for ISABELA 1 (a), ISABELA 2 (b) and ISABELA 1 and 2 combined (c)

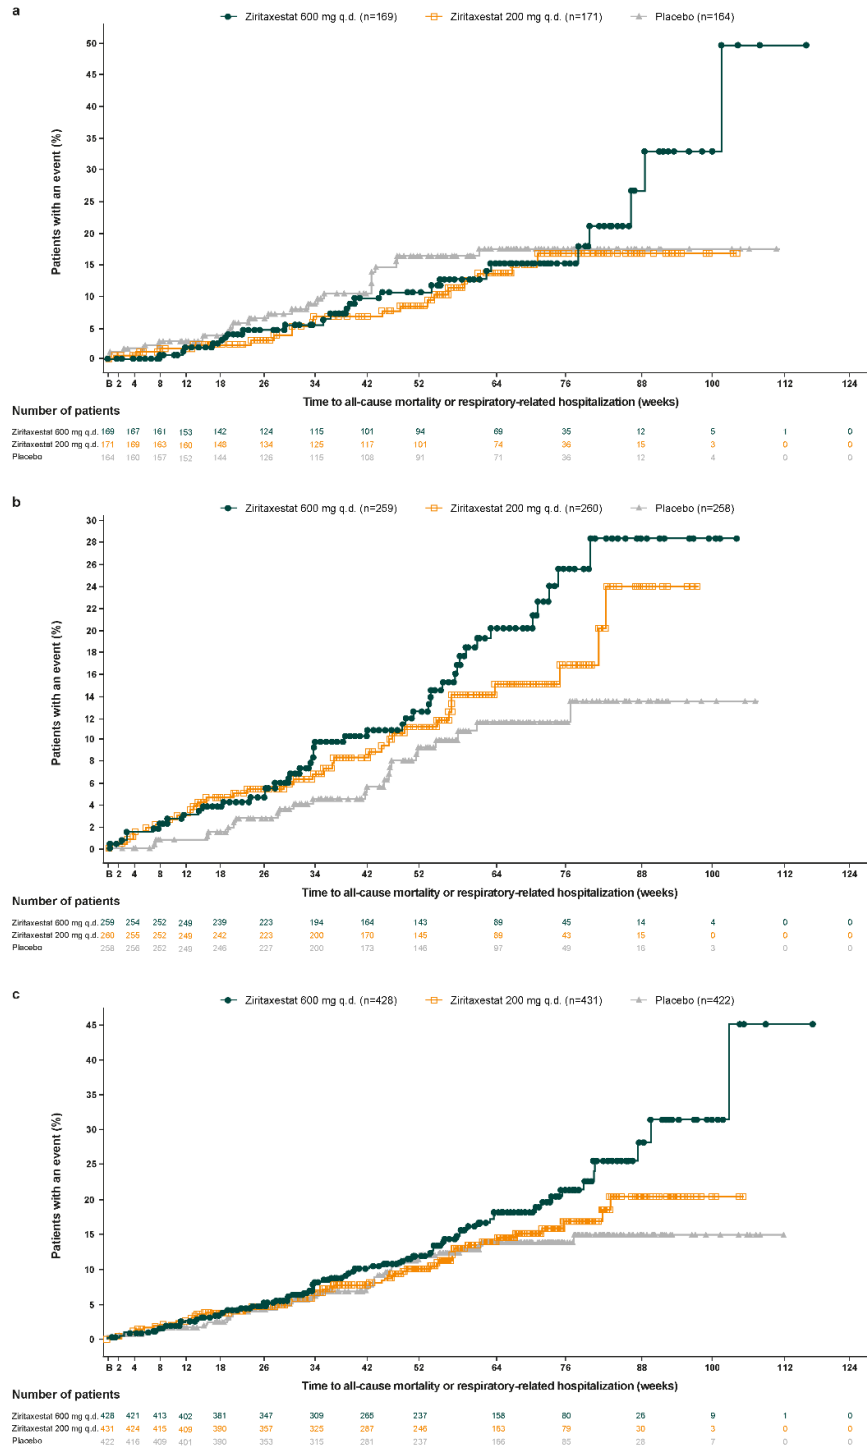

Full analysis set.  
B, baseline; q.d., once daily.

**eFigure 6.** Time to first acute IPF exacerbation (adjudicated) in ISABELA 1 (a) and ISABELA 2 (b)

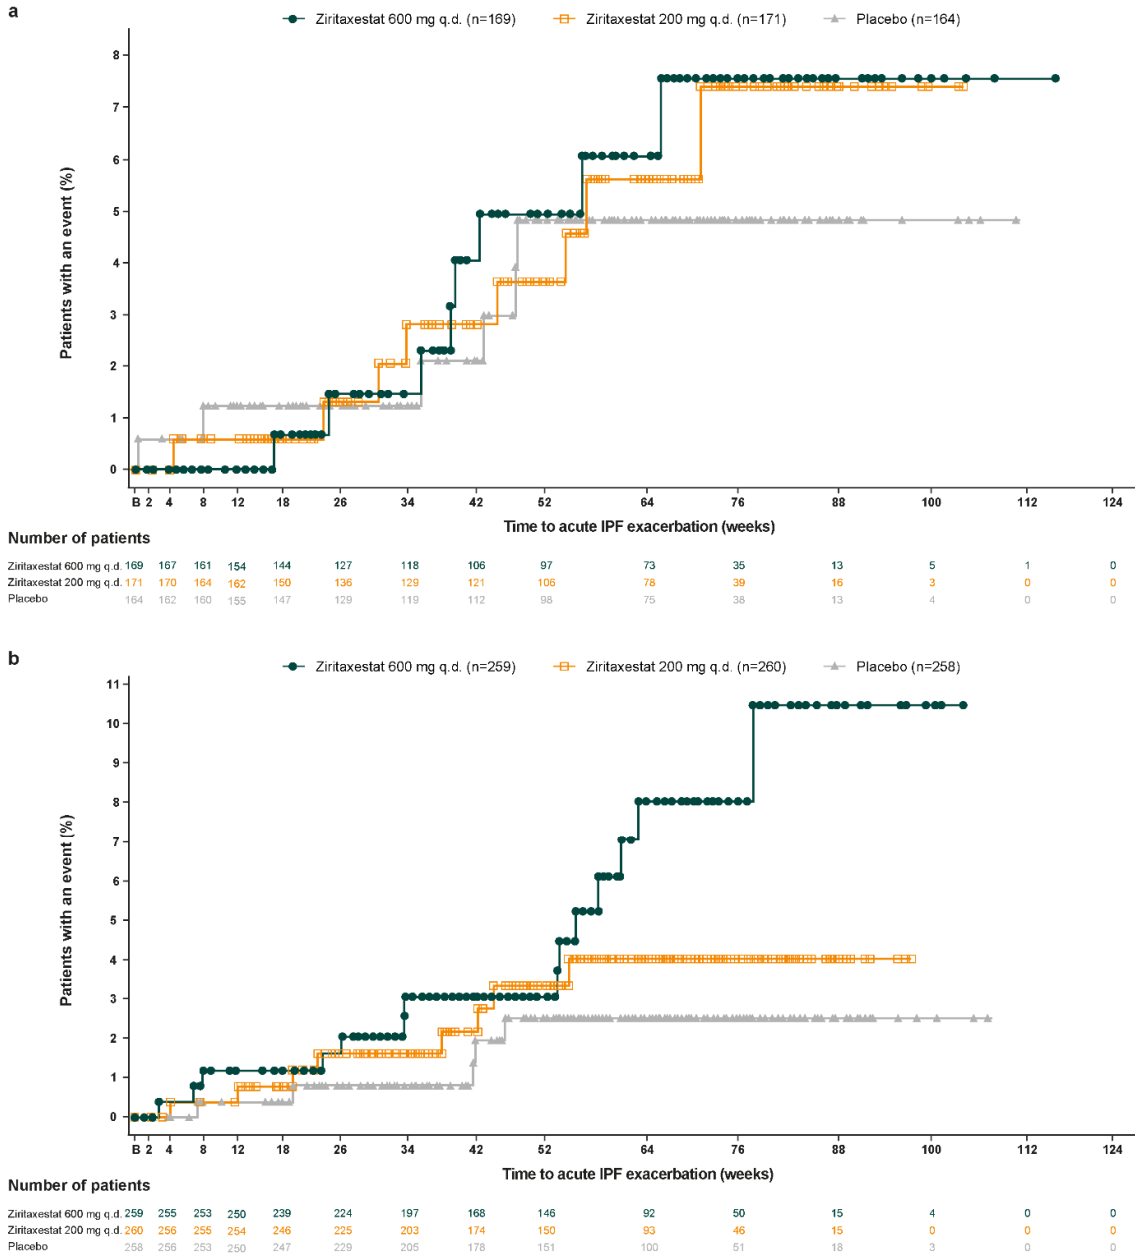

Full analysis set.  
 B, baseline; IPF, idiopathic pulmonary fibrosis; q.d., once daily.



**eFigure 7.** Mean change from baseline in FVC over time for ISABELA 1 and 2 combined

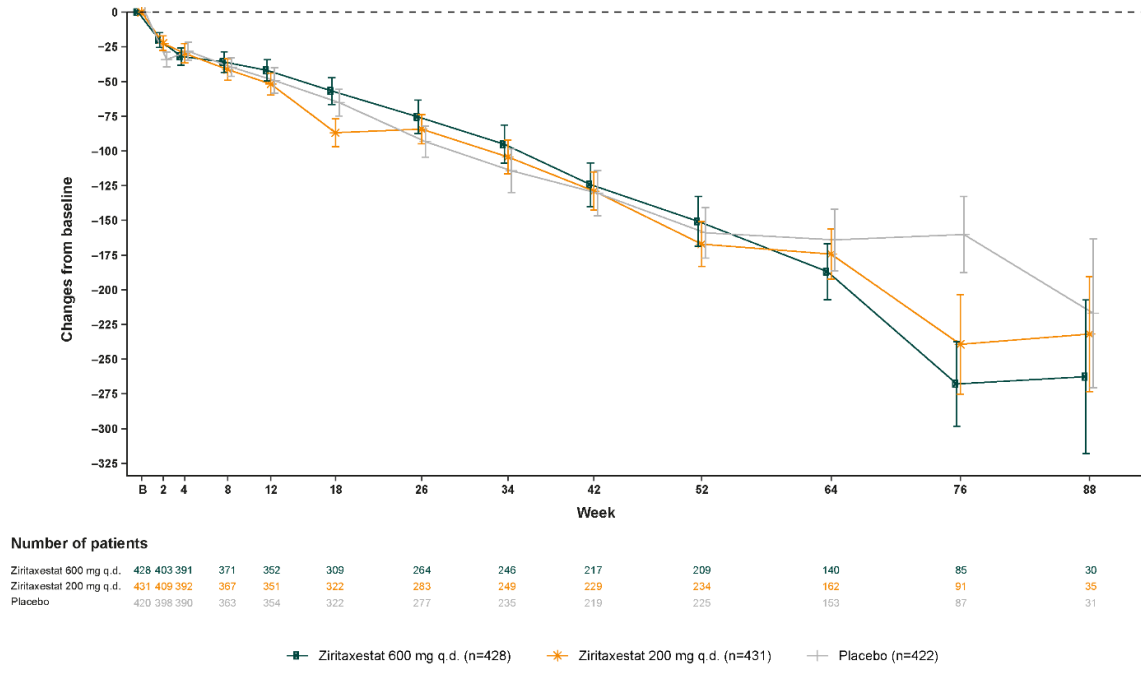

Full analysis set.  
 B, baseline; FVC, forced vital capacity; q.d., once daily.

**eFigure 8.** Change from baseline in FVC in the pirfenidone (a), nintedanib (b) and neither (c) stratum of ISABELA 1

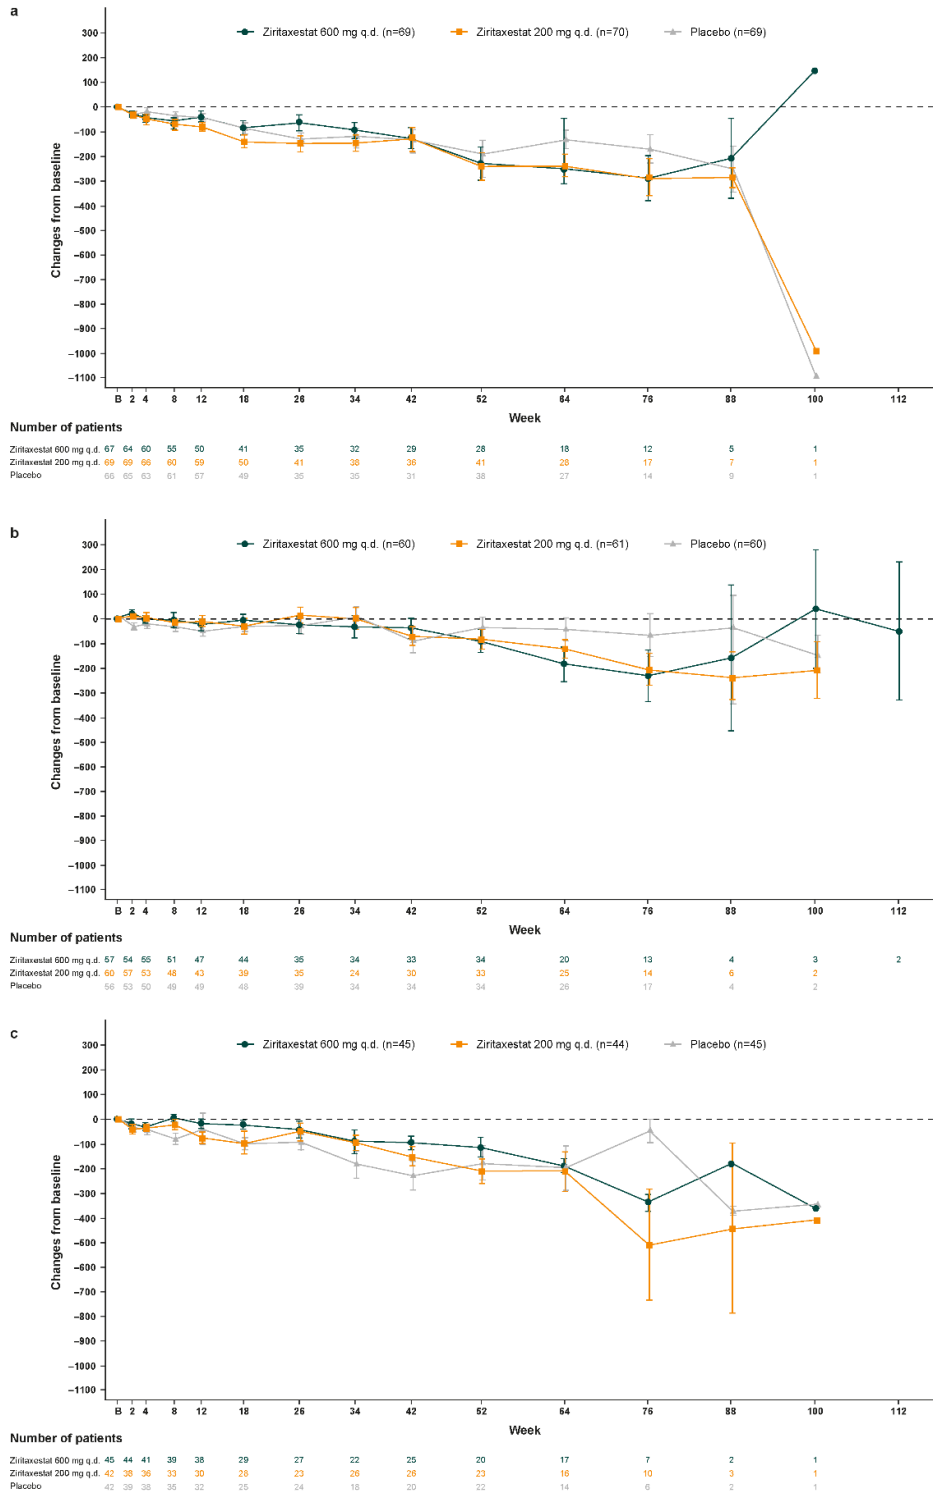

B, baseline; q.d., once daily.

**eFigure 9.** Change from baseline in FVC in the pirfenidone (a), nintedanib (b) and neither (c) stratum of ISABELA 2

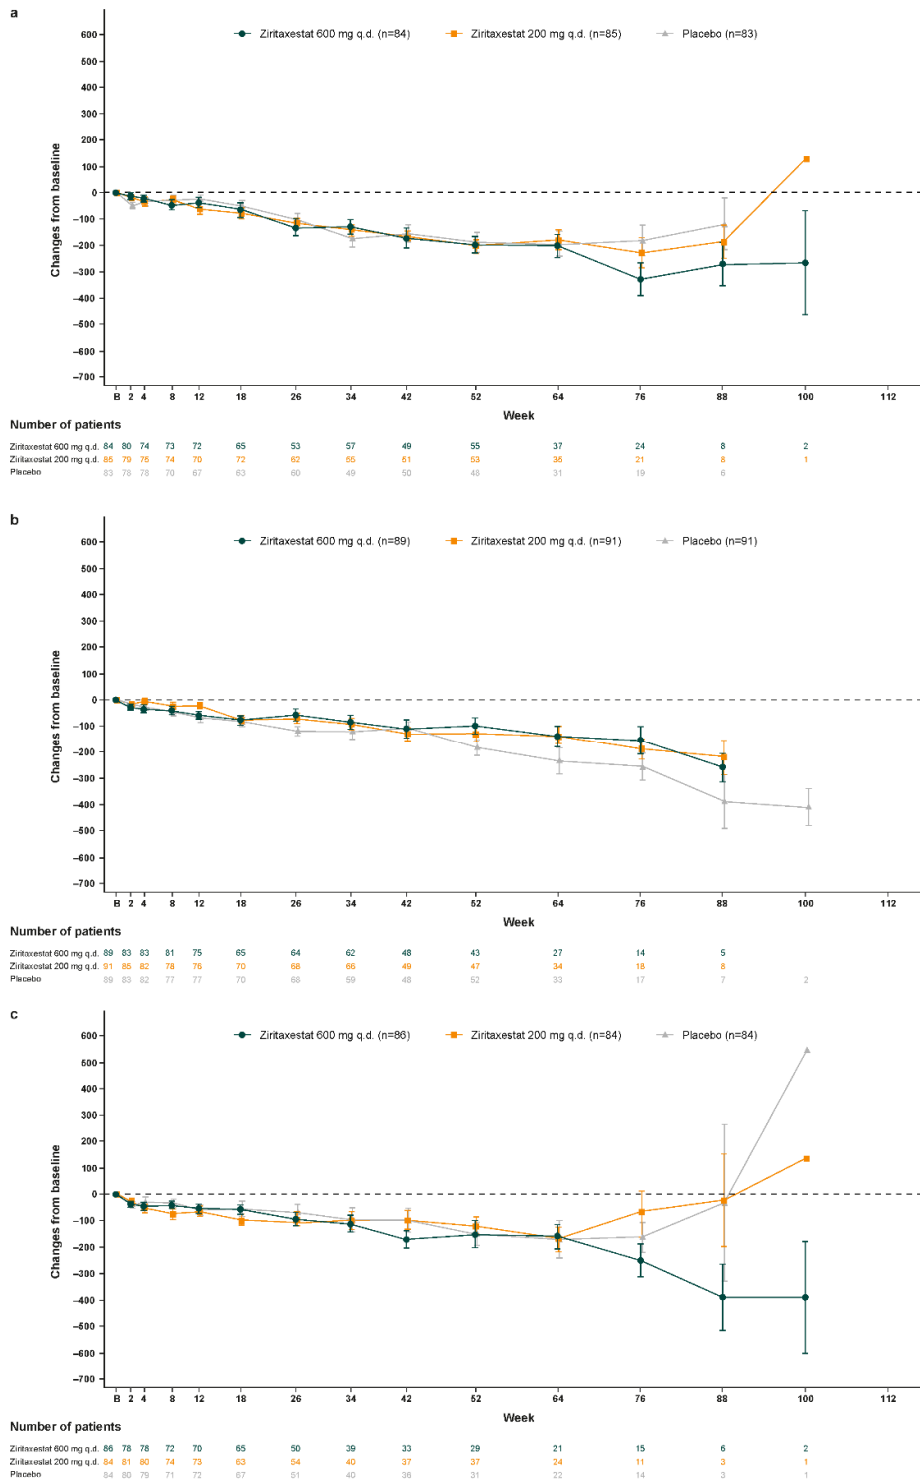

B, baseline; q.d., once daily.

**eFigure 10.** Two responder phenotypes in the population of ISABELA 1 (a), ISABELA 2 (b) and ISABELA 1 and 2 combined (c)

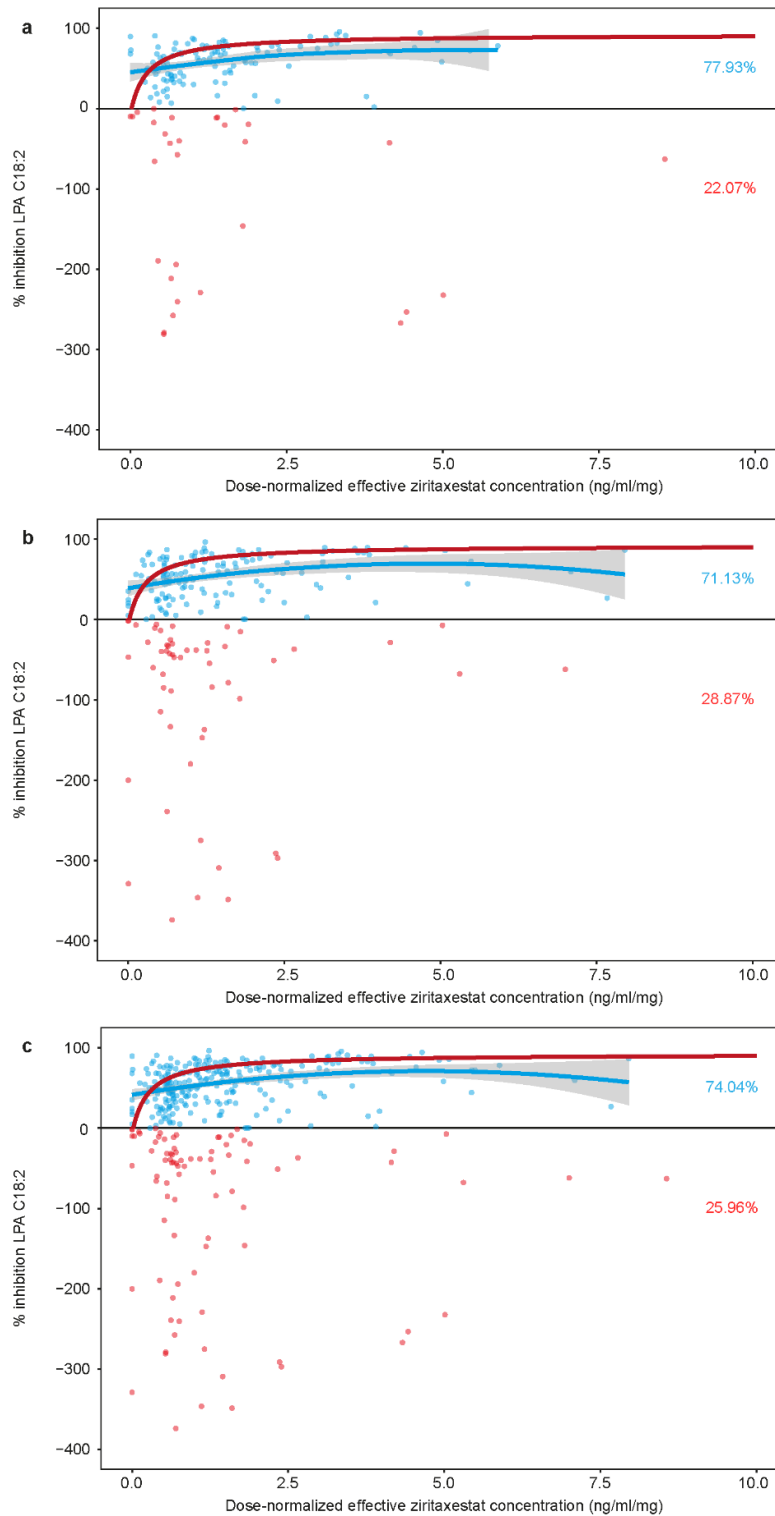

The red curve depicts the theoretical exposure–response predicted based on the model developed predominantly from data from healthy volunteers. The blue curve is the observed exposure–response trend line in responders. The percentages and circles indicate the percentage of observations with an inhibition of LPA post-dose (blue circles indicate responders, ie those with post-dose inhibition of LPA) vs those with a post dose increase in LPA (red circles indicate non-responders ie, those with post-dose increase in LPA). LPA, lysophosphatidic acid.

## eMethods

### *Endpoints*

Secondary endpoints included time to respiratory-related mortality until the end of the study; time to all-cause mortality or respiratory-related hospitalization until the end of the study; time to first acute idiopathic pulmonary fibrosis (IPF) exacerbation until the end of the study; change from baseline in forced vital capacity (FVC) at Week 52 and end of the study; change from baseline in the 6-minute walk test distance at 52 weeks and until the end of the study. Other endpoints included changes over time in target engagement/pharmacodynamics.

All-cause mortality included all deaths reported during the study and deaths that could be determined via vital status forms (vital status information was collected at Week 52, at the end of the study or at early discontinuation, and at the follow-up visit). Treatment-emergent adverse events were defined as any adverse event (AE) with an onset date on or after the start of study drug intake and no later than 30 days after last dose of study drug, or any worsening of any AE on or after the start of study drug intake.

### *Randomization and blinding*

Each patient was allocated to a given treatment using a centralized electronic system (interactive web response system [IWRS]) with permuted blocks. Allocation was described in a randomization list prepared by a contract research organization, which was stratified in a balanced manner for background SoC. For each patient, at each visit the clinical study center contacted the IWRS for the appropriate treatment number to be assigned. Patients and study personnel were blinded to the assigned treatment and blinded medication was provided to the clinical study center.

### *Pharmacokinetic assessments*

Pharmacokinetic assessments included the plasma concentration of ziritaxestat, pirfenidone and nintedanib, measured using a validated liquid chromatography with tandem mass spectrometry (LC-MS). Blood samples were collected before study drug, pirfenidone or nintedanib intake, then at Visit 3, 9 and 12. At Visit 7 and 10, samples were collected before study drug intake, but after pirfenidone or nintedanib intake, and 2 to 3 hours after study drug intake. Thereafter, samples were taken every 24 weeks before study drug intake, but after pirfenidone or nintedanib intake. Non-linear mixed effects models were applied to the data to describe the time course of ziritaxestat in the plasma and subsequently describe its exposure–response relationship. The published model [1] was taken as the base model, with effect of standard of care (SoC) and acid-reducing agents on ziritaxestat exposure evaluated as categorical covariates. Given the sparse dataset, the population pharmacokinetics model of ziritaxestat was simplified to a one-compartment model with first-order absorption. Model-based pharmacokinetic parameters (maximum observed plasma concentration at steady state [ $C_{max}$ ], minimum [trough] observed plasma concentration [ $C_{min}$ ] and area under the plasma concentration–time curve at steady state [ $AUC_{ss}$ ]) were subsequently computed.

### *Pharmacodynamic assessments*

Target engagement (autotaxin inhibition) was measured by determination of lysophosphatidic acid (LPA) C18:2 in the plasma using LC-MS. LPA levels were measured at  $C_{trough}$  at baseline, Week 26 and Week 52. Due to the limited number of samples that could be analyzed in the available timeframe, LPA was measured in a random subset of patients with an equal distribution over the treatment subgroups. The exposure–response relationship was described by fitting a population pharmacokinetic–pharmacodynamic model to the data, which aimed to evaluate target engagement across treatment strata and determine whether differences, if any, were attributable to differences in exposure. A mixture model was developed, which accounted for two responder sub-types. The structural model used to describe these patients was similar to that described previously by Taneja et al [1], i.e., the observed plasma LPA C18:2 was described by an  $I_{max}$  function driven from an effective ziritaxestat concentration, defined as the weighted sum of the ziritaxestat plasma concentration and a hypothetical effect-site concentration.

Model evaluation was performed by applying standard statistical and visual diagnostic criteria [2].

### *Statistical analyses*

Dose records describing ziritaxestat dosing amounts and administration times, covariates accounting for the SoC and acid-reducing agents, and measured ziritaxestat plasma concentrations were merged and formatted as a NONMEM-compatible analysis dataset using the R programming language (version 3.6.0 or higher). Similarly, a NONMEM-compatible analysis dataset was created for the modelling of LPA C18:2 plasma concentrations.

To analyze the pharmacokinetics and pharmacodynamics of ziritaxestat, non-linear mixed-effect modelling was performed using NONMEM (ICON Development Solutions, version 7.4.3). Analysis of results and simulations were performed using R (version 3.6.9 or higher).

## **Investigators who randomized patients to the studies**

### ***ISABELA 1***

**Australia:** Daniel Chambers, Michael Chia, Tamera Corte, Ian Glaspole, Nicole Goh, Mark Holmes, Monique Malouf, Francis Thien, Elizabeth Veitch

**Belgium:** Benjamin Bondue, Caroline Dahlqvist, Antoine Froidure, Hans Slabbynck, Wim Wuyts

**Chile:** Claudia Cartagena Salinas, Rosa Feijoó Seoane, Victor Martínez, Roxana Maturana, Juana Pavie Gallegos, Andres Rosenblut, Rafael Silva, Alvaro Undurraga Pereira

**Czech Republic:** Martina Doubkova, Norbert Pauk, Martina Plackova, Martina Sterclova

**Denmark:** Elisabeth Bendstrup, Saher B Shaker, Ingrid Titlestad

**Germany:** Stephan Budweiser, Christian Grohé, Dirk Koschel, Michael Kreuter, Antje Prasse, Michael Weber, Hubert Wirtz

**Greece:** Katerina Antoniou, Zoe Daniil, Mina Gaga, Despoina Papakosta

**Japan:** Shinyu Izumi, Masaki Okamoto

**Peru:** Alfredo Guerreros Benavides, Carlos Iberico Barrera, Alejandro Manuel Peña Villalobos

**Spain:** Aranzazu Campo Ezquibela, Jose Manuel Cifrian Martinez, Estrella Fernandez Fabrellas, Virginia Leiro, Maria Molina-Molina, Asunción Nieto Barbero, Jacobo Sellares Torres, Claudia Valenzuela

**Taiwan:** Shih-Lung Cheng, Ping-Hung Kuo, Kang-Yun Lee, Chau-Chyun Sheu

**Turkey:** Hakan Gunen, Nesrin Mogulkoc Bishop, Sibel Nayci

**United Kingdom:** Huzaiifa Adamali, Stephen Bianchi, Nazia Chaudhuri, Michael Gibbons, Simon Hart, Philip Molyneaux, Helen Parfrey, Gauri Saini, Lisa G Spencer, Sarah Wiscombe

**United States:** Danielle Antin-Ozerkis, Rebecca Bascom, John Belperio, Edward Britt, John Fitzgerald, Diana Gomez Manjarres, Mark Gotfried, Nishant Gupta, David Hotchkin, Mitchell Kaye, Mary Kreider, Shahrukh Kureishy, Peter Lacamera, Lisa Lancaster, Joseph Lasky, Daniel Lorch, Hannah Mannem, Lee Morrow, Teng Moua, Anoop Nambiar, Ganesh Raghu, Rishi Raj, Murali Ramaswamy, Raghu Reddy, Tonya Russell, Mary Beth Scholand, Barry Shea, Sally Suliman, Jeff Swigris, Krishna Thavarajah, Leslie Tolle, Rade Tomic, Neal Warshoff, Lewis Wesselius, Gordon Yung

## ***ISABELA 2***

**Argentina:** Miguel Bergna, María De Salvo, Mariano Fernandez Acquier, Alicia Rodriguez, Pablo Saez Scherbovsky

**Canada:** Deborah Assayag, Anil Dhar, Nasreen Khalil, Julie Morisset, Steeve Provencher, Chris Ryerson, Shane Shapera

**France:** Arnaud Bourdin, Bruno Crestani, Francois Lebargy, Martine Reynaud-Gaubert

**Germany:** Francesco Tommaso Bonella, Martin Claussen, Peter Hammerl, Christian Karagiannidis, Claus Keller, Winfried Randerath, Beate Stubbe

**Hungary:** Eszter Csánky, Balazs Medgyasszay, Veronika Muller

**Israel:** Yochai Adir, Amir Bar-Shai, Neville Berkman, Gershon Fink, Mordechai Kramer, David Shitrit

**Italy:** Elena Bargagli, Stefano Gasparini, Sergio Harari, Claudia Ravaglia, Luca Richeldi, Carlo Vancheri

**Japan:** Masahito Ebina, Masaki Fujita, Kazuya Ichikado, Yoshikazu Inoue, Nobuhisa Ishikawa, Shinyu Izumi, Motoyasu Kato, Tetsuji Kawamura, Yasuhiro Kondoh, Yasuhiko Nishioka, Takashi Ogura, Masaki Okamoto, Isoko Owan, Takefumi Saito, Noriho Sakamoto, Koji Sakamoto, Masahiro Shirai, Takafumi Suda, Keisuke Tomii

**Republic of Korea:** Man Pyo Chung, Sung Hwan Jeong, Choon Sik Park, Jong Sun Park, Jin Woo Song, Soo-Taek Uh

**Mexico:** Uriel Chavarria Martinez, Efrain Montano Gonzalez, Alicia Ramirez, Moises Eduardo Selman Lama

**The Netherlands:** Paul Bresser, Henk Kramer, Remy Mostard, Esther Nossent, Marcel Veltkamp, Marlies Wijssenbeek

**New Zealand:** Lutz Beckert, Catherina L Chang, Andrew Veale, Margaret Wilsher

**Poland:** Michal Bednarek, Grzegorz Gasior, Grazyna Jasieniak-Pinis, Ewa Jassem, Robert Mroz, Wojciech Piotrowski

**South Africa:** Ismail Abdullah, Anish Ambaram, Elvis Irusen, Michael Van der Linden, Richard van Zyl-Smit, Paul Williams

**United States:** James Allen, Francis Averill, Elizabeth Belloli, Anne Brown, Amy Case, Sachin Chaudhary, Gerard Criner, Kevin DeBoer, Daniel Dilling, Jeffrey Dorf, Richard Enelow, Neil Ettinger, Jeremy Feldman, Kevin Gibson, Jeffrey Golden, Mark Hamblin, Gary Hunninghake, Raj Karunakara, Hyun Kim, Tracy Luckhardt, Prema Menon, Lake Morrison, Justin Oldham, Nina Patel, Shelley Schmidt, Mary Strek, Ross Summer, Robert Sussman, James Tita, Srihari Veeraraghavan, Timothy Whelan, Joseph Zibrak



**eTable 1.** Baseline demographics and disease characteristics by strata

|                                           | ISABELA 1                |                       |                        | ISABELA 2                |                             |                         |
|-------------------------------------------|--------------------------|-----------------------|------------------------|--------------------------|-----------------------------|-------------------------|
|                                           | Pirfenidone<br>(n=208)   | Nintedanib<br>(n=181) | Neither<br>(n=134)     | Pirfenidone<br>(n=252)   | Nintedanib<br>(n=271)       | Neither<br>(n=254)      |
| Age, years                                | 70.1 (6.8)               | 69.3 (7.2)            | 70.8 (7.7)             | 69.7 (6.9)               | 69.2 (7.0)                  | 70.5 (7.2)              |
| Male, n (%)                               | 179 (86.1)               | 157 (86.7)            | 95 (70.9)              | 198 (78.6)               | 234 (86.3)                  | 199 (78.3)              |
| Race, n (%)                               |                          |                       |                        |                          |                             |                         |
| American Indian or Alaska native          | 11 (5.3)                 | 1 (0.6)               | 10 (7.5)               | 0 <sup>a</sup>           | 0 <sup>b</sup>              | 5 (2.0) <sup>a</sup>    |
| Asian                                     | 4 (1.9)                  | 16 (8.8)              | 9 (6.7)                | 67 (26.9) <sup>a</sup>   | 53 (20.6) <sup>b</sup>      | 92 (36.9) <sup>a</sup>  |
| Black or African American                 | 1 (0.5)                  | 0                     | 0                      | 2 (0.8) <sup>a</sup>     | 1 (0.4) <sup>b</sup>        | 0 <sup>a</sup>          |
| Multiple                                  | 0                        | 0                     | 0                      | 0 <sup>a</sup>           | 0 <sup>b</sup>              | 3 (1.2) <sup>a</sup>    |
| Native Hawaiian or Other Pacific Islander | 0                        | 0                     | 0                      | 1 (0.4) <sup>a</sup>     | 1 (0.4) <sup>b</sup>        | 0 <sup>a</sup>          |
| White                                     | 192 (92.3)               | 164 (90.6)            | 115 (85.8)             | 179 (71.9) <sup>a</sup>  | 202 (78.6) <sup>b</sup>     | 149 (59.8) <sup>a</sup> |
| Former smoker, n (%)                      | 125 (60.1)               | 122 (67.4)            | 75 (56.0)              | 184 (73.0)               | 207 (76.4)                  | 164 (64.6)              |
| BMI, kg/m <sup>2</sup>                    | 28.3 (3.9)               | 27.7 (3.9)            | 27.7 (3.8)             | 27.3 (3.9)               | 27.0 (4.2)                  | 26.9 (3.8)              |
| Duration of IPF, years                    | 2.4 (1.5)                | 2.4 (1.4)             | 1.8 (1.3) <sup>c</sup> | 2.6 (1.5)                | 2.4 (1.3) <sup>d</sup>      | 1.8 (1.5)               |
| FVC, mL                                   | 2900.1 (788.4)           | 2990.3 (738.3)        | 2860.1 (863.1)         | 2678.7 (753.7)           | 2897.7 (794.9) <sup>e</sup> | 2709.1 (744.8)          |
| Percent predicted FVC, %                  | 76.9 (16.1)              | 77.4 (16.1)           | 85.6 (18.7)            | 75.0 (15.5)              | 77.0 (17.1) <sup>e</sup>    | 79.9 (16.4)             |
| FEV <sub>1</sub> /FVC ratio, %            | 83.3 (4.9)               | 81.6 (5.4)            | 81.6 (6.0)             | 83.3 (5.9)               | 82.5 (5.6) <sup>e</sup>     | 82.6 (5.9)              |
| SGRQ total score, %                       | 34.1 (16.5) <sup>f</sup> | 33.8 (17.6)           | 38.4 (21.9)            | 36.8 (19.1) <sup>a</sup> | 34.3 (18.5) <sup>g</sup>    | 37.4 (21.9)             |

|                                                    | ISABELA 1              |                       |                            | ISABELA 2                  |                           |                          |
|----------------------------------------------------|------------------------|-----------------------|----------------------------|----------------------------|---------------------------|--------------------------|
|                                                    | Pirfenidone<br>(n=208) | Nintedanib<br>(n=181) | Neither<br>(n=134)         | Pirfenidone<br>(n=252)     | Nintedanib<br>(n=271)     | Neither<br>(n=254)       |
| 6MWT distance, m                                   | 418.3 (108.0)          | 406.0 (110.1)         | 390.3 (107.1) <sup>c</sup> | 403.8 (109.7) <sup>a</sup> | 417.7 (99.0) <sup>g</sup> | 382.0 (138.3)            |
| Percent predicted DLCO corrected for hemoglobin, % | 52.2 (15.4)            | 51.0 (15.9)           | 62.7 (19.1)                | 51.3 (17.4) <sup>h</sup>   | 52.5 (19.1) <sup>g</sup>  | 60.8 (21.2) <sup>i</sup> |

<sup>a</sup> n=249; <sup>b</sup> n=257; <sup>c</sup> n=133; <sup>d</sup> n=270; <sup>e</sup> n=269; <sup>f</sup> n=206; <sup>g</sup> n=270; <sup>h</sup> n=251; <sup>i</sup> n=253.

Full analysis set. Values are mean (SD) unless otherwise stated.

6MWT, 6-minute walk test; BMI, body mass index; DLCO, diffusing capacity of the lung for carbon monoxide; FEV<sub>1</sub>, forced expiratory volume in the first second; FVC, forced vital capacity; IPF, idiopathic pulmonary fibrosis; SD, standard deviation; SGRQ, St George Respiratory Questionnaire.

**eTable 2.** Duration of treatment and exposure (until the end of the studies)

|                                                 | ISABELA 1                         |                                   |                    |                    | ISABELA 2                         |                                   |                    |                    |
|-------------------------------------------------|-----------------------------------|-----------------------------------|--------------------|--------------------|-----------------------------------|-----------------------------------|--------------------|--------------------|
|                                                 | Ziritaxestat<br>600 mg<br>(n=174) | Ziritaxestat<br>200 mg<br>(n=175) | Placebo<br>(n=174) | Total<br>(N=523)   | Ziritaxestat<br>600 mg<br>(n=259) | Ziritaxestat<br>200 mg<br>(n=260) | Placebo<br>(n=258) | Total<br>(N=777)   |
| Overall compliance,<br>mean <sup>a</sup>        |                                   |                                   |                    |                    |                                   |                                   |                    |                    |
| Mean (SD), %                                    | 94.3 (13.9)                       | 96.5 (10.2)                       | 97.9 (6.2)         | 96.2 (10.7)        | 93.7 (12.0)                       | 96.5 (9.7)                        | 97.6 (7.4)         | 95.9 (10.0)        |
| Median<br>(min, max), %                         | 100.0<br>(15, 100)                | 100.0<br>(35, 101)                | 100.0<br>(63, 102) | 100.0<br>(15, 102) | 100.0<br>(42, 100)                | 100.0<br>(30, 100)                | 100.0<br>(46, 100) | 100.0<br>(30, 100) |
| Total treatment<br>duration, mean<br>(SD), days | 325.3 (197.7)                     | 356.0 (185.6)                     | 353.4 (180.2)      | 344.9 (188.1)      | 332.9 (165.7)                     | 336.9 (159.2)                     | 346.2 (156.8)      | 338.7 (160.5)      |
| Exposure to study<br>drug, patient-years        | 154.98                            | 170.56                            | 168.35             | 493.88             | 236.04                            | 239.83                            | 244.56             | 720.43             |
| Exposure to<br>pirfenidone,<br>patient-years    | 69.04                             | 77.15                             | 72.86              | 219.05             | 93.25                             | 95.76                             | 94.25              | 283.26             |
| Exposure to<br>nintedanib,<br>patient-years     | 57.03                             | 58.47                             | 64.28              | 179.78             | 87.40                             | 88.56                             | 100.40             | 276.36             |

<sup>a</sup> 100 x (number of tablets actually used) / (number of tablets that should have been used according to the randomization).  
SD, standard deviation.

**eTable 3.** Doses of standard of care during the study period<sup>a</sup>

|                                | ISABELA 1, n/N (%)     |                        |              |                | ISABELA 2, n/N (%)     |                        |              |                |
|--------------------------------|------------------------|------------------------|--------------|----------------|------------------------|------------------------|--------------|----------------|
|                                | Ziritaxestat<br>600 mg | Ziritaxestat<br>200 mg | Placebo      | Total          | Ziritaxestat<br>600 mg | Ziritaxestat<br>200 mg | Placebo      | Total          |
| Pirfenidone mean<br>daily dose |                        |                        |              |                |                        |                        |              |                |
| <1200 mg                       | 10/72 (13.9)           | 12/78 (15.4)           | 6/73 (8.2)   | 28/223 (12.6)  | 20/95 (21.1)           | 12/95 (12.6)           | 6/86 (7.0)   | 38/276 (13.8)  |
| 1200–1800 mg                   | 8/72 (11.1)            | 8/78 (10.3)            | 5/73 (6.8)   | 21/223 (9.4)   | 32/95 (33.7)           | 37/95 (38.9)           | 25/86 (29.1) | 94/276 (34.1)  |
| >1800 mg                       | 54/72 (75.0)           | 58/78 (74.4)           | 62/73 (84.9) | 174/223 (78.0) | 43/95 (45.3)           | 46/95 (48.4)           | 55/86 (64.0) | 144/276 (52.2) |
| Nintedanib mean<br>daily dose  |                        |                        |              |                |                        |                        |              |                |
| ≤200 mg                        | 16/66 (24.2)           | 11/66 (16.7)           | 7/63 (11.1)  | 34/195 (17.4)  | 35/96(36.5)            | 20/96 (20.8)           | 14/98 (14.3) | 69/290 (23.8)  |
| 200–300 mg                     | 16/66 (24.2)           | 20/66 (30.3)           | 22/63 (34.9) | 58/195 (29.7)  | 37/96 (38.5)           | 31/96 (32.3)           | 38/98 (38.8) | 106/290 (36.6) |
| ≥300 mg                        | 34/66 (51.5)           | 35/66 (53.0)           | 34/63 (54.0) | 103/195 (52.8) | 24/96 (25.0)           | 45/96 (46.9)           | 46/98 (46.9) | 115/290 (39.7) |

<sup>a</sup> The intake of pirfenidone and nintedanib was measured on Day 1, at Week 26 and Week 52.  
Full analysis set.  
Denominator is the number of patients on pirfenidone or nintedanib in each treatment arm.

**eTable 4.** Number of patients who switched standard of care (until the end of the studies)

|                                       | ISABELA 1, n/N (%)     |                        |            |              | ISABELA 2, n/N (%)     |                        |            |              |
|---------------------------------------|------------------------|------------------------|------------|--------------|------------------------|------------------------|------------|--------------|
|                                       | Ziritaxestat<br>600 mg | Ziritaxestat<br>200 mg | Placebo    | Total        | Ziritaxestat<br>600 mg | Ziritaxestat<br>200 mg | Placebo    | Total        |
| Switch from pirfenidone to nintedanib | 3/69 (4.3)             | 0                      | 1/69 (1.4) | 4/208 (1.9)  | 3/84 (3.6)             | 0                      | 1/83 (1.2) | 4/252 (1.6)  |
| Switch from nintedanib to pirfenidone | 3/60 (5.0)             | 4/61 (6.6)             | 2/60 (3.3) | 9/181 (5.0)  | 9/89 (10.1)            | 7/91 (7.7)             | 0          | 16/271 (5.9) |
| Switch from neither to pirfenidone    | 0                      | 4/44 (9.1)             | 2/45 (4.4) | 6/134 (4.5)  | 2/86 (2.3)             | 3/84 (3.6)             | 3/84 (3.6) | 8/254 (3.1)  |
| Switch from neither to nintedanib     | 3/45 (6.7)             | 5/44 (11.4)            | 2/45 (4.4) | 10/134 (7.5) | 4/86 (4.7)             | 5/84 (6.0)             | 6/84 (7.1) | 15/254 (5.9) |

Full analysis set.

**eTable 5.** Primary cause of adjudicated all-cause hospitalization

| Primary cause of hospitalization, n (%)                                                      | ISABELA 1                         |                                   |                    | ISABELA 2                         |                                   |                    |
|----------------------------------------------------------------------------------------------|-----------------------------------|-----------------------------------|--------------------|-----------------------------------|-----------------------------------|--------------------|
|                                                                                              | Ziritaxestat<br>600 mg<br>(n=169) | Ziritaxestat<br>200 mg<br>(n=171) | Placebo<br>(n=164) | Ziritaxestat<br>600 mg<br>(n=259) | Ziritaxestat<br>200 mg<br>(n=260) | Placebo<br>(n=258) |
| Respiratory related                                                                          |                                   |                                   |                    |                                   |                                   |                    |
| IPF exacerbation                                                                             | 2 (1.2)                           | 6 (3.5)                           | 6 (3.7)            | 14 (5.4)                          | 5 (1.9)                           | 5 (1.9)            |
| Respiratory related – other                                                                  | 8 (4.7)                           | 5 (2.9)                           | 8 (4.9)            | 11 (4.2)                          | 19 (7.3)                          | 5 (1.9)            |
| Respiratory related – extra parenchymal                                                      | 0                                 | 2 (1.2)                           | 1 (0.6)            | 1 (0.4)                           | 1 (0.4)                           | 1 (0.4)            |
| Total                                                                                        | 10 (5.9)                          | 13 (7.6)                          | 15 (9.1)           | 26 (10.0)                         | 25 (9.6)                          | 11 (4.3)           |
| Non-respiratory related                                                                      |                                   |                                   |                    |                                   |                                   |                    |
| Cardiovascular                                                                               | 5 (3.0)                           | 2 (1.2)                           | 4 (2.4)            | 3 (1.2)                           | 5 (1.9)                           | 7 (2.7)            |
| Cerebrovascular                                                                              | 0                                 | 3 (1.8)                           | 1 (0.6)            | 2 (0.8)                           | 3 (1.2)                           | 1 (0.4)            |
| Gastrointestinal <sup>a</sup>                                                                | 1 (0.6)                           | 5 (2.9)                           | 2 (1.2)            | 4 (1.5)                           | 3 (1.2)                           | 3 (1.2)            |
| Hemorrhage – not cardiovascular                                                              | 0                                 | 0                                 | 0                  | 2 (0.8)                           | 0                                 | 0                  |
| Hepatobiliary <sup>a</sup>                                                                   | 1 (0.6)                           | 2 (1.2)                           | 1 (0.6)            | 0                                 | 1 (0.4)                           | 1 (0.4)            |
| Infection (includes sepsis)                                                                  | 1 (0.6)                           | 1 (0.6)                           | 0                  | 0                                 | 2 (0.8)                           | 1 (0.4)            |
| Inflammatory/immune (includes autoimmune)                                                    | 0                                 | 1 (0.6)                           | 0                  | 0                                 | 0                                 | 0                  |
| Malignancy (non-cardiovascular death attributable to leukemia, lymphoma or other malignancy) | 2 (1.2)                           | 0                                 | 0                  | 2 (0.8)                           | 1 (0.4)                           | 1 (0.4)            |
| Neurological <sup>a</sup>                                                                    | 0                                 | 1 (0.6)                           | 2 (1.2)            | 0                                 | 1 (0.4)                           | 0                  |
| Non-cardiovascular procedure or surgery                                                      | 1 (0.6)                           | 1 (0.6)                           | 0                  | 1 (0.4)                           | 1 (0.4)                           | 1 (0.4)            |

| Primary cause of hospitalization, n (%)                       | ISABELA 1                         |                                   |                    | ISABELA 2                         |                                   |                    |
|---------------------------------------------------------------|-----------------------------------|-----------------------------------|--------------------|-----------------------------------|-----------------------------------|--------------------|
|                                                               | Ziritaxestat<br>600 mg<br>(n=169) | Ziritaxestat<br>200 mg<br>(n=171) | Placebo<br>(n=164) | Ziritaxestat<br>600 mg<br>(n=259) | Ziritaxestat<br>200 mg<br>(n=260) | Placebo<br>(n=258) |
| Non-prescription drug reaction or overdose                    | 0                                 | 1 (0.6)                           | 0                  | 0                                 | 0                                 | 0                  |
| Other non-respiratory                                         | 2 (1.2)                           | 1 (0.6)                           | 1 (0.6)            | 4 (1.5)                           | 2 (0.8)                           | 0                  |
| Pancreatic <sup>a</sup>                                       | 0                                 | 1 (0.6)                           | 0                  | 0                                 | 0                                 | 1 (0.4)            |
| Prescription drug reaction or overdose (includes anaphylaxis) | 0                                 | 0                                 | 0                  | 0                                 | 0                                 | 1 (0.4)            |
| Renal                                                         | 1 (0.6)                           | 1 (0.6)                           | 1 (0.6)            | 1 (0.4)                           | 2 (0.8)                           | 2 (0.8)            |
| Trauma                                                        | 1 (0.6)                           | 1 (0.6)                           | 0                  | 0                                 | 0                                 | 0                  |
| Total                                                         | 15 (8.9)                          | 21 (12.3)                         | 12 (7.3)           | 19 (7.3)                          | 21 (8.1)                          | 19 (7.4)           |
| Other                                                         |                                   |                                   |                    |                                   |                                   |                    |
| Not a charter-defined event                                   | 0                                 | 2 (1.2)                           | 1 (0.6)            | 0                                 | 2 (0.8)                           | 2 (0.8)            |
| Undetermined cause                                            | 3 (1.8)                           | 1 (0.6)                           | 2 (1.2)            | 4 (1.5)                           | 0                                 | 2 (0.8)            |
| Total                                                         | 3 (1.8)                           | 3 (1.8)                           | 3 (1.8)            | 4 (1.5)                           | 2 (0.8)                           | 4 (1.6)            |

<sup>a</sup> Excludes malignancy.

IPF, idiopathic pulmonary fibrosis.

**eTable 6.** Change from baseline at Week 52 in efficacy endpoints

|                                       | ISABELA 1                       |                                 |                            |                                                                   |                                                                   | ISABELA 2                       |                                 |                            |                                                                   |                                                                   |
|---------------------------------------|---------------------------------|---------------------------------|----------------------------|-------------------------------------------------------------------|-------------------------------------------------------------------|---------------------------------|---------------------------------|----------------------------|-------------------------------------------------------------------|-------------------------------------------------------------------|
|                                       | Ziritaxest<br>600 mg<br>(n=174) | Ziritaxest<br>200 mg<br>(n=175) | Placebo<br>(n=174)         | Difference<br>between<br>ziritaxestat<br>600 mg<br>and<br>placebo | Difference<br>between<br>ziritaxestat<br>200 mg<br>and<br>Placebo | Ziritaxest<br>600 mg<br>(n=259) | Ziritaxest<br>200 mg<br>(n=260) | Placebo<br>(n=258)         | Difference<br>between<br>ziritaxestat<br>600 mg<br>and<br>placebo | Difference<br>between<br>ziritaxestat<br>200 mg<br>and<br>placebo |
| SGRQ total score,<br>mean (95% CI), % | 2.0<br>(-1.7, 5.7)              | 4.1<br>(1.6, 6.7)               | 3.0<br>(0.3, 5.8)          | -1.0<br>(-5.6, 3.5)                                               | 1.1<br>(-2.6, 4.8)                                                | 4.8<br>(2.5, 7.0)               | 3.4<br>(1.1, 5.8)               | 3.8<br>(1.3, 6.2)          | 1.0<br>(-2.3, 4.3)                                                | -0.3<br>(-3.7, 3.0)                                               |
| 6MWT distance,<br>mean (95% CI), m    | -36.3<br>(-51.9,<br>-20.8)      | -15.6<br>(-35.3,<br>4.0)        | -34.7<br>(-57.7,<br>-11.8) | -1.6<br>(-28.9,<br>25.7)                                          | 19.1<br>(-10.7,<br>48.9)                                          | -14.5<br>(-27.6,<br>-1.4)       | -36.3<br>(-66.8,<br>-5.8)       | -22.6<br>(-34.7,<br>-10.4) | 8.1<br>(-9.6, 25.8)                                               | -13.8<br>(-46.2,<br>18.7)                                         |

Full analysis set.

6MWT, 6-minute walk test; CI, confidence interval; SGRQ, St George's Respiratory Questionnaire.



**eTable 7.** Adjudicated all-cause mortality events in ISABELA 1 and 2

|                                                                                 | <b>ISABELA 1</b>                           |                                            |                            |
|---------------------------------------------------------------------------------|--------------------------------------------|--------------------------------------------|----------------------------|
| <b>Primary cause of death, n (%)</b>                                            | <b>Ziritaxestat<br/>600 mg<br/>(n=169)</b> | <b>Ziritaxestat<br/>200 mg<br/>(n=171)</b> | <b>Placebo<br/>(n=164)</b> |
| Respiratory related                                                             |                                            |                                            |                            |
| IPF exacerbation                                                                | 2 (1.2)                                    | 1 (0.6)                                    | 1 (0.6)                    |
| Respiratory related – other                                                     | 4 (2.4)                                    | 5 (2.9)                                    | 2 (1.2)                    |
| Total                                                                           | 6 (3.6)                                    | 6 (3.5)                                    | 3 (1.8)                    |
| Non-respiratory related                                                         |                                            |                                            |                            |
| Cardiovascular                                                                  | 1 (0.6)                                    | 0                                          | 2 (1.2)                    |
| Malignancy <sup>a</sup>                                                         | 2 (1.2)                                    | 0                                          | 0                          |
| Neurological <sup>b</sup>                                                       | 0                                          | 0                                          | 1 (0.6)                    |
| Total                                                                           | 3 (1.8)                                    | 0                                          | 3 (1.8)                    |
| Other                                                                           |                                            |                                            |                            |
| Undetermined cause                                                              | 3 (1.8)                                    | 1 (0.6)                                    | 2 (1.2)                    |
| Total                                                                           | 3 (1.8)                                    | 1 (0.6)                                    | 2 (1.2)                    |
|                                                                                 | <b>ISABELA 2</b>                           |                                            |                            |
| <b>Primary cause of death, n (%)</b>                                            | <b>Ziritaxestat<br/>600 mg<br/>(n=259)</b> | <b>Ziritaxestat<br/>200 mg<br/>(n=260)</b> | <b>Placebo<br/>(n=258)</b> |
| Respiratory related                                                             |                                            |                                            |                            |
| IPF exacerbation                                                                | 4 (1.5)                                    | 2 (0.8)                                    | 1 (0.4)                    |
| Respiratory related – other                                                     | 9 (3.5)                                    | 9 (3.5)                                    | 3 (1.2)                    |
| Meets charter definition of a<br>respiratory related extra<br>parenchymal death | 2 (0.8)                                    | 0                                          | 0                          |
| Total                                                                           | 15 (5.8)                                   | 11 (4.2)                                   | 4 (1.6)                    |
| Non-respiratory related                                                         |                                            |                                            |                            |
| Cardiovascular                                                                  | 0                                          | 2 (0.8)                                    | 2 (0.8)                    |
| Cerebrovascular                                                                 | 1 (0.4)                                    | 0                                          | 0                          |
| Gastrointestinal <sup>b</sup>                                                   | 0                                          | 1 (0.4)                                    | 0                          |
| Malignancy <sup>a</sup>                                                         | 0                                          | 0                                          | 1 (0.4)                    |
| Total                                                                           | 1 (0.4)                                    | 3 (1.2)                                    | 3 (1.2)                    |

| <b>Primary cause of death, n (%)</b> | <b>Ziritaxestat<br/>600 mg<br/>(n=259)</b> | <b>Ziritaxestat<br/>200 mg<br/>(n=260)</b> | <b>Placebo<br/>(n=258)</b> |
|--------------------------------------|--------------------------------------------|--------------------------------------------|----------------------------|
| Other                                |                                            |                                            |                            |
| Undetermined cause                   | 5 (1.9)                                    | 4 (1.5)                                    | 3 (1.2)                    |
| Total                                | 5 (1.9)                                    | 4 (1.5)                                    | 3 (1.2)                    |

<sup>a</sup>Non-cardiovascular death attributable to leukemia, lymphoma or other malignancy. <sup>b</sup>Excludes malignancy.  
Full analysis set. Adjudicated events that occurred during the trials (deaths collected via vital status forms were not included).  
IPF, idiopathic pulmonary fibrosis.

**eTable 8.** Treatment-emergent adverse events and dose reductions/interruptions/discontinuations according to stratum in ISABELA 1 and 2

|                                       | ISABELA 1                        |                                  |                   |                                  |                                  |                   |                                  |                                  |                   |
|---------------------------------------|----------------------------------|----------------------------------|-------------------|----------------------------------|----------------------------------|-------------------|----------------------------------|----------------------------------|-------------------|
|                                       | Pirfenidone                      |                                  |                   | Nintedanib                       |                                  |                   | Neither                          |                                  |                   |
| Patients, n (%)                       | Ziritaxestat<br>600 mg<br>(n=69) | Ziritaxestat<br>200 mg<br>(n=70) | Placebo<br>(n=69) | Ziritaxestat<br>600 mg<br>(n=60) | Ziritaxestat<br>200 mg<br>(n=61) | Placebo<br>(n=60) | Ziritaxestat<br>600 mg<br>(n=45) | Ziritaxestat<br>200 mg<br>(n=44) | Placebo<br>(n=45) |
| TEAE                                  | 48 (69.6)                        | 60 (85.7)                        | 62 (89.9)         | 57 (95.0)                        | 52 (85.2)                        | 50 (83.3)         | 32 (71.1)                        | 36 (81.8)                        | 35 (77.8)         |
| Serious TEAE                          | 17 (24.6)                        | 13 (18.6)                        | 15 (21.7)         | 14 (23.3)                        | 16 (26.2)                        | 13 (21.7)         | 7 (15.6)                         | 9 (20.5)                         | 8 (17.8)          |
| Death                                 | 3 (4.3)                          | 3 (4.3)                          | 4 (5.8)           | 3 (5.0)                          | 2 (3.3)                          | 1 (1.7)           | 2 (4.4)                          | 1 (2.3)                          | 3 (6.7)           |
| Worst TEAE severity                   |                                  |                                  |                   |                                  |                                  |                   |                                  |                                  |                   |
| Mild                                  | 7 (10.1)                         | 12 (17.1)                        | 13 (18.8)         | 5 (8.3)                          | 9 (14.8)                         | 7 (11.7)          | 2 (4.4)                          | 12 (27.3)                        | 9 (20.0)          |
| Moderate                              | 24 (34.8)                        | 30 (42.9)                        | 33 (47.8)         | 35 (58.3)                        | 26 (42.6)                        | 29 (48.3)         | 23 (51.1)                        | 13 (29.5)                        | 18 (40.0)         |
| Severe                                | 12 (17.4)                        | 14 (20.0)                        | 12 (17.4)         | 14 (23.3)                        | 11 (18.0)                        | 9 (15.0)          | 3 (6.7)                          | 10 (22.7)                        | 5 (11.1)          |
| Life-threatening                      | 1 (1.4)                          | 1 (1.4)                          | 0                 | 0                                | 4 (6.6)                          | 4 (6.7)           | 2 (4.4)                          | 0                                | 0                 |
| Death                                 | 4 (5.8)                          | 3 (4.3)                          | 4 (5.8)           | 3 (5.0)                          | 2 (3.3)                          | 1 (1.7)           | 2 (4.4)                          | 1 (2.3)                          | 3 (6.7)           |
| Treatment-related TEAE to study drug  | 16 (23.2)                        | 17 (24.3)                        | 24 (34.8)         | 35 (58.3)                        | 25 (41.0)                        | 19 (31.7)         | 9 (20.0)                         | 11 (25.0)                        | 10 (22.2)         |
| Treatment-related TEAE to pirfenidone | 15 (21.7)                        | 21 (30.0)                        | 18 (26.1)         | 5 (8.3)                          | 5 (8.2)                          | 6 (10.0)          | 2 (4.4)                          | 2 (4.5)                          | 2 (4.4)           |
| Treatment-related TEAE to nintedanib  | 4 (5.8)                          | 7 (10.0)                         | 6 (8.7)           | 42 (70.0)                        | 27 (44.3)                        | 18 (30.0)         | 4 (8.9)                          | 5 (11.4)                         | 2 (4.4)           |

| Patients, n (%)        | Pirfenidone                      |                                  |                   | Nintedanib                       |                                  |                   | Neither                          |                                  |                   |
|------------------------|----------------------------------|----------------------------------|-------------------|----------------------------------|----------------------------------|-------------------|----------------------------------|----------------------------------|-------------------|
|                        | Ziritaxestat<br>600 mg<br>(n=69) | Ziritaxestat<br>200 mg<br>(n=70) | Placebo<br>(n=69) | Ziritaxestat<br>600 mg<br>(n=60) | Ziritaxestat<br>200 mg<br>(n=61) | Placebo<br>(n=60) | Ziritaxestat<br>600 mg<br>(n=45) | Ziritaxestat<br>200 mg<br>(n=44) | Placebo<br>(n=45) |
| Study drug             |                                  |                                  |                   |                                  |                                  |                   |                                  |                                  |                   |
| Reduced                | 0                                | 1 (1.4)                          | 0                 | 7 (11.7)                         | 4 (6.6)                          | 2 (3.3)           | 2 (4.4)                          | 1 (2.3)                          | 1 (2.2)           |
| Interrupted            | 6 (8.7)                          | 8 (11.4)                         | 4 (5.8)           | 17 (28.3)                        | 15 (24.6)                        | 10 (16.7)         | 7 (15.6)                         | 6 (13.6)                         | 9 (20.0)          |
| Permanently<br>stopped | 7 (10.1)                         | 2 (2.9)                          | 8 (11.6)          | 8 (13.3)                         | 6 (9.8)                          | 4 (6.7)           | 3 (6.7)                          | 2 (4.5)                          | 1 (2.2)           |
| Pirfenidone            |                                  |                                  |                   |                                  |                                  |                   |                                  |                                  |                   |
| Reduced                | 1 (1.4)                          | 2 (2.9)                          | 2 (2.9)           | 0                                | 0                                | 0                 | 0                                | 1 (2.3)                          | 1 (2.2)           |
| Interrupted            | 2 (2.9)                          | 3 (4.3)                          | 5 (7.2)           | 1 (1.7)                          | 0                                | 0                 | 1 (2.2)                          | 1 (2.3)                          | 0                 |
| Permanently<br>stopped | 3 (4.3)                          | 2 (2.9)                          | 4 (5.8)           | 0                                | 0                                | 0                 | 0                                | 0                                | 0                 |
| Nintedanib             |                                  |                                  |                   |                                  |                                  |                   |                                  |                                  |                   |
| Reduced                | 1 (1.4)                          | 0                                | 0                 | 6 (10.0)                         | 3 (4.9)                          | 6 (10.0)          | 0                                | 0                                | 0                 |
| Interrupted            | 1 (1.4)                          | 0                                | 0                 | 12 (20.0)                        | 8 (13.1)                         | 10 (16.7)         | 0                                | 2 (4.5)                          | 0                 |
| Permanently<br>stopped | 1 (1.4)                          | 0                                | 0                 | 2 (3.3)                          | 4 (6.6)                          | 0                 | 1 (2.2)                          | 2 (4.5)                          | 0                 |

|                                          | ISABELA 2                        |                                  |                   |                                  |                                  |                   |                                  |                                  |                   |
|------------------------------------------|----------------------------------|----------------------------------|-------------------|----------------------------------|----------------------------------|-------------------|----------------------------------|----------------------------------|-------------------|
|                                          | Pirfenidone                      |                                  |                   | Nintedanib                       |                                  |                   | Neither                          |                                  |                   |
| Patients, n (%)                          | Ziritaxestat<br>600 mg<br>(n=84) | Ziritaxestat<br>200 mg<br>(n=85) | Placebo<br>(n=83) | Ziritaxestat<br>600 mg<br>(n=89) | Ziritaxestat<br>200 mg<br>(n=91) | Placebo<br>(n=91) | Ziritaxestat<br>600 mg<br>(n=86) | Ziritaxestat<br>200 mg<br>(n=84) | Placebo<br>(n=84) |
| TEAE                                     | 65 (77.4)                        | 72 (84.7)                        | 67 (80.7)         | 85 (95.5)                        | 80 (87.9)                        | 73 (80.2)         | 60 (69.8)                        | 71 (84.5)                        | 55 (65.5)         |
| Serious TEAE                             | 25 (29.8)                        | 25 (29.4)                        | 14 (16.9)         | 23 (25.8)                        | 19 (20.9)                        | 15 (16.5)         | 16 (18.6)                        | 19 (22.6)                        | 13 (15.5)         |
| Death                                    | 8 (9.5)                          | 9 (10.6)                         | 4 (4.8)           | 5 (5.6)                          | 5 (5.5)                          | 1 (1.1)           | 9 (10.5)                         | 6 (7.1)                          | 5 (6.0)           |
| Worst TEAE severity                      |                                  |                                  |                   |                                  |                                  |                   |                                  |                                  |                   |
| Mild                                     | 11 (13.1)                        | 11 (12.9)                        | 10 (12.0)         | 13 (14.6)                        | 22 (24.2)                        | 18 (19.8)         | 10 (11.6)                        | 17 (20.2)                        | 12 (14.3)         |
| Moderate                                 | 30 (35.7)                        | 37 (43.5)                        | 40 (48.2)         | 46 (51.7)                        | 38 (41.8)                        | 39 (42.9)         | 35 (40.7)                        | 33 (39.3)                        | 29 (34.5)         |
| Severe                                   | 15 (17.9)                        | 14 (16.5)                        | 12 (14.5)         | 18 (20.2)                        | 15 (16.5)                        | 14 (15.4)         | 5 (5.8)                          | 15 (17.9)                        | 7 (8.3)           |
| Life-threatening                         | 1 (1.2)                          | 1 (1.2)                          | 1 (1.2)           | 3 (3.4)                          | 0                                | 1 (1.1)           | 1 (1.2)                          | 0                                | 2 (2.4)           |
| Death                                    | 8 (9.5)                          | 9 (10.6)                         | 4 (4.8)           | 5 (5.6)                          | 5 (5.5)                          | 1 (1.1)           | 9 (10.5)                         | 6 (7.1)                          | 5 (6.0)           |
| Treatment-related<br>TEAE to study drug  | 21 (25.0)                        | 16 (18.8)                        | 23 (27.7)         | 63 (70.8)                        | 47 (51.6)                        | 32 (35.2)         | 12 (14.0)                        | 17 (20.2)                        | 15 (17.9)         |
| Treatment-related<br>TEAE to pirfenidone | 12 (14.3)                        | 23 (27.1)                        | 23 (27.7)         | 3 (3.4)                          | 6 (6.6)                          | 4 (4.4)           | 4 (4.7)                          | 5 (6.0)                          | 3 (3.6)           |
| Treatment-related<br>TEAE to nintedanib  | 5 (6.0)                          | 4 (4.7)                          | 3 (3.6)           | 70 (78.7)                        | 44 (48.4)                        | 36 (39.6)         | 5 (5.8)                          | 6 (7.1)                          | 3 (3.6)           |

| Patients, n (%)        | Pirfenidone                      |                                  |                   | Nintedanib                       |                                  |                   | Neither                          |                                  |                   |
|------------------------|----------------------------------|----------------------------------|-------------------|----------------------------------|----------------------------------|-------------------|----------------------------------|----------------------------------|-------------------|
|                        | Ziritaxestat<br>600 mg<br>(n=84) | Ziritaxestat<br>200 mg<br>(n=85) | Placebo<br>(n=83) | Ziritaxestat<br>600 mg<br>(n=89) | Ziritaxestat<br>200 mg<br>(n=91) | Placebo<br>(n=91) | Ziritaxestat<br>600 mg<br>(n=86) | Ziritaxestat<br>200 mg<br>(n=84) | Placebo<br>(n=84) |
| Study drug             |                                  |                                  |                   |                                  |                                  |                   |                                  |                                  |                   |
| Reduced                | 3 (3.6)                          | 0                                | 2 (2.4)           | 24 (27.0)                        | 9 (9.9)                          | 7 (7.7)           | 3 (3.5)                          | 3 (3.6)                          | 0                 |
| Interrupted            | 15 (17.9)                        | 11 (12.9)                        | 7 (8.4)           | 33 (37.1)                        | 14 (15.4)                        | 14 (15.4)         | 9 (10.5)                         | 12 (14.3)                        | 12 (14.3)         |
| Permanently<br>stopped | 9 (10.7)                         | 7 (8.2)                          | 7 (8.4)           | 15 (16.9)                        | 12 (13.2)                        | 5 (5.5)           | 5 (5.8)                          | 8 (9.5)                          | 6 (7.1)           |
| Pirfenidone            |                                  |                                  |                   |                                  |                                  |                   |                                  |                                  |                   |
| Reduced                | 4 (4.8)                          | 5 (5.9)                          | 2 (2.4)           | 1 (1.1)                          | 1 (1.1)                          | 0                 | 0                                | 0                                | 0                 |
| Interrupted            | 6 (7.1)                          | 8 (9.4)                          | 5 (6.0)           | 2 (2.2)                          | 0                                | 0                 | 0                                | 1 (1.2)                          | 0                 |
| Permanently<br>stopped | 7 (8.3)                          | 2 (2.4)                          | 7 (8.4)           | 1 (1.1)                          | 1 (1.1)                          | 0                 | 0                                | 0                                | 1 (1.2)           |
| Nintedanib             |                                  |                                  |                   |                                  |                                  |                   |                                  |                                  |                   |
| Reduced                | 1 (1.2)                          | 0                                | 0                 | 23 (25.8)                        | 6 (6.6)                          | 10 (11.0)         | 0                                | 2 (2.4)                          | 0                 |
| Interrupted            | 1 (1.2)                          | 0                                | 0                 | 24 (27.0)                        | 17 (18.7)                        | 13 (14.3)         | 0                                | 2 (2.4)                          | 1 (1.2)           |
| Permanently<br>stopped | 0                                | 0                                | 0                 | 10 (11.2)                        | 3 (3.3)                          | 1 (1.1)           | 0                                | 0                                | 1 (1.2)           |

Full analysis set.

Events listed in the table occurred during the trial, on or after the start of study drug intake and no later than 30 days after the last dose of study drug.

TEAE, treatment-emergent adverse event.

**eTable 9.** Treatment-emergent adverse events with a  $\geq 5\%$  incidence in at least one treatment group in ISABELA 1 and 2

|                                                      | <b>ISABELA 1</b>                           |                                            |                            |
|------------------------------------------------------|--------------------------------------------|--------------------------------------------|----------------------------|
| <b>Patients, n (%)</b>                               | <b>Ziritaxestat<br/>600 mg<br/>(n=174)</b> | <b>Ziritaxestat<br/>200 mg<br/>(n=175)</b> | <b>Placebo<br/>(n=174)</b> |
| TEAE                                                 | 137 (78.7)                                 | 148 (84.6)                                 | 147 (84.5)                 |
| Gastrointestinal disorders                           |                                            |                                            |                            |
| Diarrhea                                             | 51 (29.3)                                  | 41 (23.4)                                  | 20 (11.5)                  |
| Gastroesophageal reflux disease                      | 9 (5.2)                                    | 3 (1.7)                                    | 2 (1.1)                    |
| Nausea                                               | 16 (9.2)                                   | 14 (8.0)                                   | 10 (5.7)                   |
| General disorders and administration-site conditions |                                            |                                            |                            |
| Fatigue                                              | 10 (5.7)                                   | 9 (5.1)                                    | 6 (3.4)                    |
| Infections and infestations                          |                                            |                                            |                            |
| Bronchitis                                           | 8 (4.6)                                    | 11 (6.3)                                   | 4 (2.3)                    |
| Nasopharyngitis                                      | 11 (6.3)                                   | 7 (4.0)                                    | 10 (5.7)                   |
| Upper respiratory tract infection                    | 10 (5.7)                                   | 12 (6.9)                                   | 11 (6.3)                   |
| Musculoskeletal and connective tissue disorders      |                                            |                                            |                            |
| Back pain                                            | 3 (1.7)                                    | 9 (5.1)                                    | 9 (5.2)                    |
| Nervous system disorders                             |                                            |                                            |                            |
| Dizziness                                            | 8 (4.6)                                    | 5 (2.9)                                    | 9 (5.2)                    |
| Headache                                             | 9 (5.2)                                    | 13 (7.4)                                   | 10 (5.7)                   |
| Respiratory, thoracic and mediastinal disorders      |                                            |                                            |                            |
| Cough                                                | 16 (9.2)                                   | 21 (12.0)                                  | 16 (9.2)                   |
| Dyspnea                                              | 10 (5.7)                                   | 17 (9.7)                                   | 10 (5.7)                   |
| IPF                                                  | 21 (12.1)                                  | 15 (8.6)                                   | 21 (12.1)                  |
|                                                      | <b>ISABELA 2</b>                           |                                            |                            |
| <b>Patients, n (%)</b>                               | <b>Ziritaxestat<br/>600 mg<br/>(n=259)</b> | <b>Ziritaxestat<br/>200 mg<br/>(n=260)</b> | <b>Placebo<br/>(n=258)</b> |
| TEAE                                                 | 210 (81.1)                                 | 223 (85.8)                                 | 195 (75.6)                 |
| Gastrointestinal disorders                           |                                            |                                            |                            |
| Diarrhea                                             | 74 (28.6)                                  | 58 (22.3)                                  | 47 (18.2)                  |
| Nausea                                               | 23 (8.9)                                   | 16 (6.2)                                   | 13 (5.0)                   |

| <b>Patients, n (%)</b>                          | <b>Ziritaxestat<br/>600 mg<br/>(n=259)</b> | <b>Ziritaxestat<br/>200 mg<br/>(n=260)</b> | <b>Placebo<br/>(n=258)</b> |
|-------------------------------------------------|--------------------------------------------|--------------------------------------------|----------------------------|
| Infections and infestations                     |                                            |                                            |                            |
| Bronchitis                                      | 14 (5.4)                                   | 11 (4.2)                                   | 4 (1.6)                    |
| Nasopharyngitis                                 | 16 (6.2)                                   | 16 (6.2)                                   | 13 (5.0)                   |
| Upper respiratory tract infection               | 19 (7.3)                                   | 22 (8.5)                                   | 17 (6.6)                   |
| Investigations                                  |                                            |                                            |                            |
| Weight decreased                                | 14 (5.4)                                   | 9 (3.5)                                    | 8 (3.1)                    |
| Metabolism and nutrition disorders              |                                            |                                            |                            |
| Decreased appetite                              | 20 (7.7)                                   | 14 (5.4)                                   | 9 (3.5)                    |
| Musculoskeletal and connective tissue disorders |                                            |                                            |                            |
| Back pain                                       | 13 (5.0)                                   | 6 (2.3)                                    | 6 (2.3)                    |
| Nervous system disorders                        |                                            |                                            |                            |
| Headache                                        | 16 (6.2)                                   | 14 (5.4)                                   | 15 (5.8)                   |
| Respiratory, thoracic and mediastinal disorders |                                            |                                            |                            |
| Cough                                           | 24 (9.3)                                   | 21 (8.1)                                   | 22 (8.5)                   |
| Dyspnea                                         | 14 (5.4)                                   | 13 (5.0)                                   | 22 (8.5)                   |
| IPF                                             | 36 (13.9)                                  | 31 (11.9)                                  | 21 (8.1)                   |

Full analysis set.

IPF, idiopathic pulmonary fibrosis; TEAE, treatment-emergent adverse event.



**eTable 10.** Treatment-emergent adverse events leading to death in ISABELA 1 and 2

| System organ class and preferred term, n (%)         | ISABELA 1                         |                                   |                    |
|------------------------------------------------------|-----------------------------------|-----------------------------------|--------------------|
|                                                      | Ziritaxestat<br>600 mg<br>(n=174) | Ziritaxestat<br>200 mg<br>(n=175) | Placebo<br>(n=174) |
| TEAE leading to death                                | 8 (4.6)                           | 6 (3.4)                           | 8 (4.6)            |
| Cardiac disorders                                    |                                   |                                   |                    |
| Acute myocardial infarction                          | 0                                 | 0                                 | 1 (0.6)            |
| Cardiac failure congestive                           | 0                                 | 1 (0.6)                           | 0                  |
| Myocardial infarction                                | 1 (0.6)                           | 0                                 | 0                  |
| Myocardial rupture                                   | 0                                 | 0                                 | 1 (0.6)            |
| Pericardial hemorrhage                               | 0                                 | 0                                 | 1 (0.6)            |
| Total                                                | 1 (0.6)                           | 1 (0.6)                           | 1 (0.6)            |
| General disorders and administration-site conditions |                                   |                                   |                    |
| Sudden death                                         | 0                                 | 1 (0.6)                           | 0                  |
| Total                                                | 0                                 | 1 (0.6)                           | 0                  |
| Infections and infestations                          |                                   |                                   |                    |
| COVID-19 pneumonia                                   | 0                                 | 2 (1.1)                           | 0                  |
| Lower respiratory tract infections                   | 0                                 | 0                                 | 1 (0.6)            |
| Pneumonia                                            | 2 (1.1)                           | 0                                 | 0                  |
| Suspected COVID-19                                   | 0                                 | 0                                 | 1 (0.6)            |
| Total                                                | 2 (1.1)                           | 2 (1.1)                           | 2 (1.1)            |
| Nervous system disorders                             |                                   |                                   |                    |
| Limbic encephalitis                                  | 0                                 | 0                                 | 1 (0.6)            |
| Total                                                | 0                                 | 0                                 | 1 (0.6)            |
| Respiratory, thoracic and mediastinal disorders      |                                   |                                   |                    |
| Acute respiratory failure                            | 0                                 | 1 (0.6)                           | 1 (0.6)            |
| IPF                                                  | 4 (2.3)                           | 1 (0.6)                           | 3 (1.7)            |
| Pulmonary embolism                                   | 1 (0.6)                           | 0                                 | 0                  |
| Total                                                | 5 (2.9)                           | 2 (1.1)                           | 4 (2.3)            |

| System organ class and preferred term, n (%)              | ISABELA 2                         |                                   |                    |
|-----------------------------------------------------------|-----------------------------------|-----------------------------------|--------------------|
|                                                           | Ziritaxestat<br>600 mg<br>(n=259) | Ziritaxestat<br>200 mg<br>(n=260) | Placebo<br>(n=258) |
| No TEAE leading to death                                  | 237 (91.5)                        | 240 (92.3)                        | 248 (96.1)         |
| TEAE leading to death                                     | 22 (8.5)                          | 20 (7.7)                          | 10 (3.9)           |
| Cardiac disorders                                         |                                   |                                   |                    |
| Acute cardiac event                                       | 0                                 | 1 (0.4)                           | 0                  |
| Acute myocardial infarction                               | 1 (0.4)                           | 1 (0.4)                           | 0                  |
| Cardiac arrest                                            | 0                                 | 1 (0.4)                           | 0                  |
| Cardiac failure acute                                     | 0                                 | 0                                 | 1 (0.4)            |
| Cardiogenic shock                                         | 0                                 | 0                                 | 1 (0.4)            |
| Myocardial infarction                                     | 0                                 | 1 (0.4)                           | 2 (0.8)            |
| Total                                                     | 1 (0.4)                           | 4 (1.5)                           | 4 (1.6)            |
| Gastrointestinal disorders                                |                                   |                                   |                    |
| Intestinal ischemia                                       | 0                                 | 1 (0.4)                           | 0                  |
| Total                                                     | 0                                 | 1 (0.4)                           | 0                  |
| General disorders and administration-site conditions      |                                   |                                   |                    |
| Death                                                     | 1 (0.4)                           | 1 (0.4)                           | 1 (0.4)            |
| Total                                                     | 1 (0.4)                           | 1 (0.4)                           | 1 (0.4)            |
| Infections and infestations                               |                                   |                                   |                    |
| COVID-19                                                  | 2 (0.8)                           | 4 (1.5)                           | 0                  |
| COVID-19 pneumonia                                        | 1 (0.4)                           | 1 (0.4)                           | 0                  |
| Pneumonia                                                 | 4 (1.5)                           | 1 (0.4)                           | 2 (0.8)            |
| Pneumonia, bacterial                                      | 1 (0.4)                           | 0                                 | 0                  |
| Total                                                     | 8 (3.1)                           | 6 (2.3)                           | 2 (0.8)            |
| Neoplasms, benign, malignant and unspecified <sup>a</sup> |                                   |                                   |                    |
| Lung adenocarcinoma stage IV                              | 0                                 | 0                                 | 1 (0.4)            |
| Total                                                     | 0                                 | 0                                 | 1 (0.4)            |
| Nervous system disorders                                  |                                   |                                   |                    |
| Ischemic stroke                                           | 1 (0.4)                           | 0                                 | 0                  |
| Total                                                     | 1 (0.4)                           | 0                                 | 0                  |

| <b>System organ class and preferred term, n (%)</b> | <b>Ziritaxestat<br/>600 mg<br/>(n=259)</b> | <b>Ziritaxestat<br/>200 mg<br/>(n=260)</b> | <b>Placebo<br/>(n=258)</b> |
|-----------------------------------------------------|--------------------------------------------|--------------------------------------------|----------------------------|
| Respiratory, thoracic and mediastinal disorders     |                                            |                                            |                            |
| Acute respiratory distress syndrome                 | 0                                          | 2 (0.8)                                    | 0                          |
| Acute respiratory failure                           | 0                                          | 2 (0.8)                                    | 1 (0.4)                    |
| Dyspnea                                             | 0                                          | 1 (0.4)                                    | 0                          |
| Hypoxia                                             | 0                                          | 1 (0.4)                                    | 0                          |
| IPF <sup>a</sup>                                    | 5 (1.9)                                    | 3 (1.2)                                    | 1 (0.4)                    |
| Pneumothorax spontaneous                            | 1 (0.4)                                    | 0                                          | 0                          |
| Respiratory distress                                | 1 (0.4)                                    | 0                                          | 0                          |
| Respiratory failure                                 | 4 (1.5)                                    | 0                                          | 0                          |
| <b>Total</b>                                        | <b>11 (4.2)</b>                            | <b>9 (3.5)</b>                             | <b>2 (0.8)</b>             |

<sup>a</sup> Includes cysts and polyps.

Full analysis set.

Deaths include adverse events reported as leading to death that occurred during the trial, on or after the start of study drug intake and no later than 30 days after the last dose of study drug.

IPF, idiopathic pulmonary fibrosis; TEAE, treatment-emergent adverse event.

**eTable 11.** Summary of adverse events leading to deaths

| <b>ISABELA 1</b>       |                |                                                                  |
|------------------------|----------------|------------------------------------------------------------------|
| <b>Treatment group</b> | <b>Stratum</b> | <b>Cause of death<br/>(as provided verbatim by investigator)</b> |
| Ziritaxestat 600 mg    | Nintedanib     | Colon tumor                                                      |
| Ziritaxestat 600 mg    | Nintedanib     | Bilateral pneumonia                                              |
| Ziritaxestat 600 mg    | Neither        | Worsening of IPF                                                 |
| Ziritaxestat 600 mg    | Nintedanib     | Pneumonia                                                        |
| Ziritaxestat 600 mg    | Pirfenidone    | Progression of IPF                                               |
| Ziritaxestat 600 mg    | Nintedanib     | Lung squamous-cell carcinoma, metastatic                         |
| Ziritaxestat 600 mg    | Pirfenidone    | Hypoxemic respiratory failure                                    |
| Ziritaxestat 600 mg    | Pirfenidone    | Unknown cause of death – cardiac arrest                          |
| Ziritaxestat 600 mg    | Pirfenidone    | Pulmonary embolism                                               |
| Ziritaxestat 600 mg    | Neither        | IPF with acute exacerbation                                      |
| Ziritaxestat 600 mg    | Nintedanib     | IPF progression                                                  |
| Ziritaxestat 600 mg    | Pirfenidone    | Myocardial infarction                                            |
| Ziritaxestat 200 mg    | Pirfenidone    | Decompensated congestive heart failure                           |
| Ziritaxestat 200 mg    | Neither        | Pneumonia by COVID-19                                            |
| Ziritaxestat 200 mg    | Nintedanib     | COVID-19 pneumonia                                               |
| Ziritaxestat 200 mg    | Nintedanib     | Major progression of lung fibrosis                               |
| Ziritaxestat 200 mg    | Pirfenidone    | Unknown cause of death                                           |
| Ziritaxestat 200 mg    | Pirfenidone    | COVID-19 pneumonia                                               |
| Ziritaxestat 200 mg    | Pirfenidone    | Worsening of IPF condition                                       |
| Ziritaxestat 200 mg    | Nintedanib     | Acute respiratory failure with hypoxia                           |
| Placebo                | Pirfenidone    | Acute exacerbation of IPF                                        |
| Placebo                | Neither        | Lower respiratory tract lung infection                           |
| Placebo                | Neither        | Progressive pulmonary fibrosis                                   |
| Placebo                | Neither        | Suspected COVID-19 infection                                     |
| Placebo                | Pirfenidone    | Acute respiratory failure                                        |
| Placebo                | Pirfenidone    | Limbic encephalitis                                              |
| Placebo                | Pirfenidone    | Acute IPF exacerbation                                           |
| Placebo                | Nintedanib     | Acute myocardial infarction                                      |
| Placebo                | Nintedanib     | Myocardial rupture/pericardial hemorrhage                        |

| <b>ISABELA 2</b>       |                |                                                                                      |
|------------------------|----------------|--------------------------------------------------------------------------------------|
| <b>Treatment group</b> | <b>Stratum</b> | <b>Cause of death</b>                                                                |
| Ziritaxestat 600 mg    | Neither        | Pneumonia                                                                            |
| Ziritaxestat 600 mg    | Neither        | Bilateral spontaneous pneumothorax with pneumomediastinum and subcutaneous emphysema |
| Ziritaxestat 600 mg    | Pirfenidone    | IPF exacerbation                                                                     |
| Ziritaxestat 600 mg    | Pirfenidone    | Acute exacerbation of IPF                                                            |
| Ziritaxestat 600 mg    | Nintedanib     | Acute exacerbation of IPF with acute respiratory hypoxic insufficiency               |
| Ziritaxestat 600 mg    | Nintedanib     | COVID-19 infection coronavirus                                                       |
| Ziritaxestat 600 mg    | Pirfenidone    | Respiratory failure                                                                  |
| Ziritaxestat 600 mg    | Pirfenidone    | COVID-19 pneumonia                                                                   |
| Ziritaxestat 600 mg    | Neither        | Pneumonia                                                                            |
| Ziritaxestat 600 mg    | Pirfenidone    | Pneumonia, bacterial                                                                 |
| Ziritaxestat 600 mg    | Neither        | Acute myocardial infarction                                                          |
| Ziritaxestat 600 mg    | Pirfenidone    | Pneumonia                                                                            |
| Ziritaxestat 600 mg    | Neither        | Acute respiratory distress                                                           |
| Ziritaxestat 600 mg    | Neither        | Respiratory failure                                                                  |
| Ziritaxestat 600 mg    | Neither        | Respiratory failure                                                                  |
| Ziritaxestat 600 mg    | Neither        | Hospitalization for IPF exacerbation                                                 |
| Ziritaxestat 600 mg    | Pirfenidone    | COVID-19 infection                                                                   |
| Ziritaxestat 600 mg    | Nintedanib     | Worsening IPF                                                                        |
| Ziritaxestat 600 mg    | Pirfenidone    | Exacerbation of IPF                                                                  |
| Ziritaxestat 600 mg    | Nintedanib     | Right upper lobe pneumonia                                                           |
| Ziritaxestat 600 mg    | Neither        | Ischemic stroke                                                                      |
| Ziritaxestat 600 mg    | Nintedanib     | Unknown cause of death (probable IPF)                                                |
| Ziritaxestat 600 mg    | Nintedanib     | Acute hypoxic respiratory failure due to worsening if IPF                            |
| Ziritaxestat 200 mg    | Neither        | COVID-19 infection                                                                   |
| Ziritaxestat 200 mg    | Pirfenidone    | Exacerbation of IPF                                                                  |
| Ziritaxestat 200 mg    | Neither        | COVID-19 pneumonia                                                                   |
| Ziritaxestat 200 mg    | Nintedanib     | Sudden death, most likely cardiac event                                              |
| Ziritaxestat 200 mg    | Nintedanib     | Unknown cause of death                                                               |
| Ziritaxestat 200 mg    | Pirfenidone    | IPF acute exacerbation                                                               |
| Ziritaxestat 200 mg    | Pirfenidone    | Acute mesenteric ischemia                                                            |

| <b>Treatment group</b> | <b>Stratum</b> | <b>Cause of death</b>                                                                  |
|------------------------|----------------|----------------------------------------------------------------------------------------|
| Ziritaxestat 200 mg    | Pirfenidone    | Exacerbation of IPF                                                                    |
| Ziritaxestat 200 mg    | Neither        | Adult respiratory difficulty syndrome, suspected coronavirus                           |
| Ziritaxestat 200 mg    | Neither        | Acute respiratory insufficiency                                                        |
| Ziritaxestat 200 mg    | Pirfenidone    | Heart attack                                                                           |
| Ziritaxestat 200 mg    | Pirfenidone    | Unwitnessed cardiac arrest                                                             |
| Ziritaxestat 200 mg    | Nintedanib     | Hospitalization for worsening of IPF (followed by death)                               |
| Ziritaxestat 200 mg    | Nintedanib     | Pneumonia                                                                              |
| Ziritaxestat 200 mg    | Pirfenidone    | COVID-19 infection cause of death (nose swab test was performed and test was positive) |
| Ziritaxestat 200 mg    | Nintedanib     | Increased dyspnea due to worsening IPF                                                 |
| Ziritaxestat 200 mg    | Pirfenidone    | COVID-19 infection                                                                     |
| Ziritaxestat 200 mg    | Pirfenidone    | Hypoxemia                                                                              |
| Ziritaxestat 200 mg    | Pirfenidone    | Worsening IPF                                                                          |
| Ziritaxestat 200 mg    | Nintedanib     | Acute myocardial infarction/acute respiratory failure                                  |
| Ziritaxestat 200 mg    | Neither        | Acute respiratory distress syndrome secondary to sepsis                                |
| Ziritaxestat 200 mg    | Neither        | COVID-19                                                                               |
| Placebo                | Pirfenidone    | Pneumonia                                                                              |
| Placebo                | Neither        | Cardiogenic shock                                                                      |
| Placebo                | Neither        | Exacerbation of IPF                                                                    |
| Placebo                | Pirfenidone    | Heart attack                                                                           |
| Placebo                | Pirfenidone    | Acute heart failure                                                                    |
| Placebo                | Nintedanib     | Myocardial infarction                                                                  |
| Placebo                | Neither        | Suspected primary bronchial carcinoma                                                  |
| Placebo                | Nintedanib     | Metastatic adenocarcinoma of lung                                                      |
| Placebo                | Neither        | Pneumonia; lobes involved unknown                                                      |
| Placebo                | Pirfenidone    | NSCLC stage IV adenocarcinoma                                                          |
| Placebo                | Neither        | Acute chronic respiratory failure with hypoxia                                         |
| Placebo                | Neither        | Unknown cause of death                                                                 |

COVID-19, coronavirus disease 2019; IPF, idiopathic pulmonary fibrosis; NSCLC, non-small cell lung cancer.

**eTable 12.** Treatment-emergent adverse events related to COVID-19 infections and suspected infections in ISABELA 1 and 2

|                                                           | <b>ISABELA 1</b>                   |                                    |                        |
|-----------------------------------------------------------|------------------------------------|------------------------------------|------------------------|
| <b>System organ class and preferred term, n (%)</b>       | <b>Ziritaxestat 600 mg (n=174)</b> | <b>Ziritaxestat 200 mg (n=175)</b> | <b>Placebo (n=174)</b> |
| TEAE related to COVID-19 infection or suspected infection | 4 (2.3)                            | 7 (4.0)                            | 7 (4.0)                |
| Infections                                                |                                    |                                    |                        |
| COVID-19 infection                                        | 2 (1.1)                            | 3 (1.7)                            | 5 (2.9)                |
| COVID-19 pneumonia                                        | 1 (0.6)                            | 3 (1.7)                            | 0                      |
| Suspected COVID-19                                        | 0                                  | 0                                  | 1 (0.6)                |
| Injury, poisoning or procedural complication              |                                    |                                    |                        |
| Vaccination complication                                  | 0                                  | 1 (0.6)                            | 0                      |
| Investigations                                            |                                    |                                    |                        |
| SARS-CoV-2 test positive                                  | 0                                  | 1 (0.6)                            | 0                      |
| Metabolism and nutrition disorders                        |                                    |                                    |                        |
| Hypertriglyceridemia                                      | 0                                  | 0                                  | 1 (0.6)                |
| Respiratory, thoracic and mediastinal disorders           |                                    |                                    |                        |
| Dyspnea                                                   | 0                                  | 1 (0.6)                            | 0                      |
| Respiratory failure                                       | 1 (0.6)                            | 0                                  | 0                      |
| Skin and subcutaneous tissue disorders                    |                                    |                                    |                        |
| Drug eruption                                             | 1 (0.6)                            | 0                                  | 0                      |
|                                                           | <b>ISABELA 2</b>                   |                                    |                        |
| <b>System organ class and preferred term, n (%)</b>       | <b>Ziritaxestat 600 mg (n=259)</b> | <b>Ziritaxestat 200 mg (n=260)</b> | <b>Placebo (n=258)</b> |
| TEAE related to COVID-19 infection or suspected infection | 14 (5.4)                           | 11 (4.2)                           | 6 (2.3)                |
| Blood and lymphatic system disorders                      |                                    |                                    |                        |
| Anemia                                                    | 0                                  | 0                                  | 1 (0.4)                |

| <b>System organ class and preferred term, n (%)</b> | <b>Ziritaxestat 600 mg (n=259)</b> | <b>Ziritaxestat 200 mg (n=260)</b> | <b>Placebo (n=258)</b> |
|-----------------------------------------------------|------------------------------------|------------------------------------|------------------------|
| Infections                                          |                                    |                                    |                        |
| Asymptomatic COVID-19                               | 1 (0.4)                            | 1 (0.4)                            | 0                      |
| COVID-19                                            | 10 (3.9)                           | 7 (2.7)                            | 3 (1.2)                |
| COVID-19 pneumonia                                  | 1 (0.4)                            | 2 (0.8)                            | 1 (0.4)                |
| Influenzal pneumonia                                | 1 (0.4)                            | 0                                  | 0                      |
| Rhinitis                                            | 1 (0.4)                            | 0                                  | 0                      |
| Investigations                                      |                                    |                                    |                        |
| Amylase increased                                   | 0                                  | 0                                  | 1 (0.4)                |
| Lipase increased                                    | 0                                  | 0                                  | 1 (0.4)                |
| SARS-CoV-2 test positive                            | 0                                  | 1 (0.4)                            | 0                      |
| Nervous system disorders                            |                                    |                                    |                        |
| Dizziness                                           | 1 (0.4)                            | 0                                  | 0                      |
| Renal and urinary disorders                         |                                    |                                    |                        |
| Renal impairment                                    | 1 (0.4)                            | 0                                  | 0                      |
| Respiratory, thoracic and mediastinal disorders     |                                    |                                    | 9                      |
| Organizing pneumonia                                | 1 (0.4)                            | 0                                  | 0                      |
| Productive cough                                    | 1 (0.4)                            | 0                                  | 0                      |

COVID-19, coronavirus disease 2019; SARS-CoV-2, severe acute respiratory syndrome-associated coronavirus 2; TEAE, treatment-emergent adverse event.



**eTable 13.** Impact of COVID-19 on study visits

|                                                     | <b>ISABELA 1</b>                           |                                            |                            |                          |
|-----------------------------------------------------|--------------------------------------------|--------------------------------------------|----------------------------|--------------------------|
| <b>Patients, n (%)</b>                              | <b>Ziritaxestat<br/>600 mg<br/>(n=174)</b> | <b>Ziritaxestat<br/>200 mg<br/>(n=175)</b> | <b>Placebo<br/>(n=174)</b> | <b>Total<br/>(N=523)</b> |
| Number of missing or virtual visits due to COVID-19 |                                            |                                            |                            |                          |
| 0                                                   | 60 (34.5)                                  | 50 (28.6)                                  | 59 (33.9)                  | 169 (32.3)               |
| 1                                                   | 55 (31.6)                                  | 55 (31.4)                                  | 62 (35.6)                  | 172 (32.9)               |
| 2                                                   | 21 (12.1)                                  | 28 (16.0)                                  | 20 (11.5)                  | 69 (13.2)                |
| 3                                                   | 14 (8.0)                                   | 15 (8.6)                                   | 14 (8.0)                   | 43 (8.2)                 |
| 4                                                   | 11 (6.3)                                   | 11 (6.3)                                   | 10 (5.7)                   | 32 (6.1)                 |
| 5                                                   | 6 (3.4)                                    | 7 (4.0)                                    | 5 (2.9)                    | 18 (3.4)                 |
| 6                                                   | 2 (1.1)                                    | 6 (3.4)                                    | 2 (1.1)                    | 10 (1.9)                 |
| 7                                                   | 3 (1.7)                                    | 2 (1.1)                                    | 1 (0.6)                    | 6 (1.1)                  |
| 8                                                   | 1 (0.6)                                    | 1 (0.6)                                    | 0                          | 2 (0.4)                  |
| 10                                                  | 1 (0.6)                                    | 0                                          | 1 (0.6)                    | 2 (0.4)                  |
|                                                     | <b>ISABELA 2</b>                           |                                            |                            |                          |
| <b>Patients, n (%)</b>                              | <b>Ziritaxestat<br/>600 mg<br/>(n=259)</b> | <b>Ziritaxestat<br/>200 mg<br/>(n=260)</b> | <b>Placebo<br/>(n=258)</b> | <b>Total<br/>(N=777)</b> |
| Number of missing or virtual visits due to COVID-19 |                                            |                                            |                            |                          |
| 0                                                   | 93 (35.9)                                  | 108 (41.5)                                 | 93 (36.0)                  | 294 (37.8)               |
| 1                                                   | 78 (30.1)                                  | 75 (28.8)                                  | 78 (30.2)                  | 231 (29.7)               |
| 2                                                   | 36 (13.9)                                  | 33 (12.7)                                  | 31 (12.0)                  | 100 (12.9)               |
| 3                                                   | 18 (6.9)                                   | 20 (7.7)                                   | 21 (8.1)                   | 59 (7.6)                 |
| 4                                                   | 14 (5.4)                                   | 10 (3.8)                                   | 15 (5.8)                   | 39 (5.0)                 |
| 5                                                   | 9 (3.5)                                    | 7 (2.7)                                    | 13 (5.0)                   | 29 (3.7)                 |
| 6                                                   | 5 (1.9)                                    | 3 (1.2)                                    | 3 (1.2)                    | 11 (1.4)                 |
| 7                                                   | 3 (1.2)                                    | 0                                          | 2 (0.8)                    | 5 (0.6)                  |
| 8                                                   | 1 (0.4)                                    | 3 (1.2)                                    | 1 (0.4)                    | 5 (0.6)                  |
| 9                                                   | 2 (0.8)                                    | 1 (0.4)                                    | 1 (0.4)                    | 4 (0.5)                  |

COVID-19, coronavirus disease 2019.

**eTable 14.** Model-derived ziritaxestat pharmacokinetic parameters in ISABELA 1 and 2

| SoC                | Ziritaxestat dose, mg | AUC <sub>50th</sub> , ng.mL/h    | AUC <sub>5th</sub> , ng.mL/h | AUC <sub>95th</sub> , ng.mL/h | C <sub>min50th</sub> , ng/mL | C <sub>min5th</sub> , ng/mL | C <sub>min95th</sub> , ng/mL | C <sub>max50th</sub> , ng/mL  | C <sub>max5th</sub> , ng/mL | C <sub>max95th</sub> , ng/mL |
|--------------------|-----------------------|----------------------------------|------------------------------|-------------------------------|------------------------------|-----------------------------|------------------------------|-------------------------------|-----------------------------|------------------------------|
| <b>ISABELA 1</b>   |                       |                                  |                              |                               |                              |                             |                              |                               |                             |                              |
| <b>Neither</b>     | 200                   | 9622<br>(7327.66,<br>11916.34)   | 4895                         | 27139                         | 91<br>(59.84,<br>122.16)     | 40.96                       | 428.9                        | 807<br>(669.34,<br>944.66)    | 471                         | 1712                         |
|                    | 600                   | 50832<br>(39988.6,<br>61675.4)   | 21592                        | 109027                        | 526<br>(368.71,<br>683.29)   | 183                         | 1751                         | 3966<br>(3336.35,<br>4595.65) | 2040                        | 6847                         |
| <b>Nintedanib</b>  | 200                   | 9450<br>(8579.75,<br>10320.25)   | 5233                         | 18567                         | 98<br>(85.2,<br>110.8)       | 46.29                       | 278.1                        | 738<br>(688.56,<br>787.44)    | 469.2                       | 1197                         |
|                    | 600                   | 42446<br>(36367.83,<br>48524.17) | 19266                        | 90414                         | 461<br>(355.75,<br>566.25)   | 167.9                       | 1557                         | 3206<br>(2884.03,<br>3527.97) | 1756                        | 5503                         |
| <b>Pirfenidone</b> | 200                   | 5745<br>(5321.92,<br>6168.08)    | 2837                         | 11910                         | 49<br>(44.86,<br>53.14)      | 22.59                       | 120.1                        | 538<br>(505.84,<br>570.16)    | 296                         | 947.6                        |
|                    | 600                   | 19820<br>(15485.36,<br>24154.64) | 11779                        | 60299                         | 166<br>(122.55,<br>209.45)   | 94.08                       | 670.6                        | 1902<br>(1577.86,<br>2226.14) | 1221                        | 4494                         |

| SoC                | Ziritaxestat dose, mg | AUC <sub>50th</sub> , ng.mL/h    | AUC <sub>5th</sub> , ng.mL/h | AUC <sub>95th</sub> , ng.mL/h | C <sub>min50th</sub> , ng/mL | C <sub>min5th</sub> , ng/mL | C <sub>min95th</sub> , ng/mL | C <sub>max50th</sub> , ng/mL  | C <sub>max5th</sub> , ng/mL | C <sub>max95th</sub> , ng/mL |
|--------------------|-----------------------|----------------------------------|------------------------------|-------------------------------|------------------------------|-----------------------------|------------------------------|-------------------------------|-----------------------------|------------------------------|
| <b>ISABELA 2</b>   |                       |                                  |                              |                               |                              |                             |                              |                               |                             |                              |
| <b>Neither</b>     | 200                   | 11558<br>(10475.95,<br>12640.05) | 5905                         | 20615                         | 115<br>(99.9, 130.1)         | 50.6                        | 270.3                        | 927<br>(863.72,<br>990.28)    | 549.9                       | 1409                         |
|                    | 600                   | 40776<br>(37010.42,<br>44541.58) | 23842                        | 95256                         | 392<br>(343.94,<br>440.06)   | 204.9                       | 1379                         | 3368<br>(3136.15,<br>3599.85) | 2211                        | 6227                         |
| <b>Nintedanib</b>  | 200                   | 10329<br>(9221.48,<br>11436.52)  | 4584                         | 19053                         | 111<br>(93.63,<br>128.37)    | 39.58                       | 289.6                        | 788<br>(726.61,<br>849.39)    | 422.7                       | 1220                         |
|                    | 600                   | 44737<br>(40771.8,<br>48702.2)   | 17367                        | 77193                         | 498<br>(433.83,<br>562.17)   | 148.9                       | 1191                         | 3330<br>(3114.01,<br>3545.99) | 1616                        | 4913                         |
| <b>Pirfenidone</b> | 200                   | 5706<br>(5260.09,<br>6151.91)    | 3334                         | 13245                         | 49<br>(44.59,<br>53.41)      | 26.86                       | 138.7                        | 535<br>(501.49,<br>568.51)    | 340.5                       | 1025                         |
|                    | 600                   | 22412<br>(20283.49,<br>24540.51) | 12543                        | 59954                         | 191<br>(170.05,<br>211.95)   | 100.6                       | 664.5                        | 2104<br>(1943.01,<br>2264.99) | 1289                        | 4475                         |

Pharmacokinetic analysis set.

Each parameter is presented as median, 5<sup>th</sup> and 95<sup>th</sup> percentiles of its stimulated distribution. Figures in parentheses are the 90<sup>th</sup> percentile CI of the median of the parameter.

AUC, area under the concentration–time curve; CI, confidence interval; C<sub>max</sub>, maximum observed concentration at steady state; C<sub>min</sub>, minimum (trough) observed plasma concentration; SoC, standard of care.

## eReferences

1. Taneja A, Desrivot J, Diderichsen PM, et al. Population pharmacokinetic and pharmacodynamic analysis of GLPG1690, an autotaxin inhibitor, in healthy volunteers and patients with idiopathic pulmonary fibrosis. *Clin Pharmacokinet*. 2019;58(9):1175-1191. doi:10.1007/s40262-019-00755-3.
2. Nguyen, TH, Mouksassi MS, Holford N, et al. Model evaluation of continuous data pharmacometric models: metrics and graphics. *CPT Pharmacometrics Syst Pharmacol*. 2017;6(2):87-109.
