# Supplementary material
Source: PubMed Central journal article supplement (PMC10170340)
Supplement: jama-e235355-s004.pdf [file jama-e235355-s004.pdf]

\*First name, last name, and suffix (if applicable) are required and will appear in PubMed.

| <b>*Group Name(s): ISABELA 1 and 2 investigators</b> |                   |                              |                  |             |                                          |                                                         |                                                                                            |
|------------------------------------------------------|-------------------|------------------------------|------------------|-------------|------------------------------------------|---------------------------------------------------------|--------------------------------------------------------------------------------------------|
| <b>*First Name and Middle Initial(s)</b>             | <b>*Last Name</b> | <b>*Suffix (eg, Jr, III)</b> | Academic Degrees | Institution | Location (city, state/province, country) | Role or Contribution, eg, chair, principal investigator | Group (if more than 1 Group listed in the byline) and/or Subgroup (eg, Steering Committee) |
| Daniel                                               | Chambers          |                              |                  |             | Australia                                |                                                         |                                                                                            |
| Michael                                              | Chia              |                              |                  |             | Australia                                |                                                         |                                                                                            |
| Tamera                                               | Corte             |                              |                  |             | Australia                                |                                                         |                                                                                            |
| Ian                                                  | Glaspole          |                              |                  |             | Australia                                |                                                         |                                                                                            |
| Nicole                                               | Goh               |                              |                  |             | Australia                                |                                                         |                                                                                            |
| Mark                                                 | Holmes            |                              |                  |             | Australia                                |                                                         |                                                                                            |
| Monique                                              | Malouf            |                              |                  |             | Australia                                |                                                         |                                                                                            |
| Francis                                              | Thien             |                              |                  |             | Australia                                |                                                         |                                                                                            |
| Elizabeth                                            | Veitch            |                              |                  |             | Australia                                |                                                         |                                                                                            |
| Benjamin                                             | Bondue            |                              |                  |             | Belgium                                  |                                                         |                                                                                            |
| Caroline                                             | Dahlqvist         |                              |                  |             | Belgium                                  |                                                         |                                                                                            |
| Antoine                                              | Froidure          |                              |                  |             | Belgium                                  |                                                         |                                                                                            |
| Hans                                                 | Slabbynck         |                              |                  |             | Belgium                                  |                                                         |                                                                                            |
| Wim                                                  | Wuyts             |                              |                  |             | Belgium                                  |                                                         |                                                                                            |
| Claudia                                              | Cartagena Salinas |                              |                  |             | Chile                                    |                                                         |                                                                                            |
| Rosa                                                 | Feijoó Seoane     |                              |                  |             | Chile                                    |                                                         |                                                                                            |
| Victor                                               | Martínez          |                              |                  |             | Chile                                    |                                                         |                                                                                            |
| Roxana                                               | Maturana          |                              |                  |             | Chile                                    |                                                         |                                                                                            |
| Juana                                                | Pavie Gallegos    |                              |                  |             | Chile                                    |                                                         |                                                                                            |
| Andres                                               | Rosenblut         |                              |                  |             | Chile                                    |                                                         |                                                                                            |
| Rafael                                               | Silva             |                              |                  |             | Chile                                    |                                                         |                                                                                            |
| Alvaro                                               | Undurraga Pereira |                              |                  |             | Chile                                    |                                                         |                                                                                            |
| Martina                                              | Doubkova          |                              |                  |             | Czech Republic                           |                                                         |                                                                                            |
| Norbert                                              | Pauk              |                              |                  |             | Czech Republic                           |                                                         |                                                                                            |
| Martina                                              | Plackova          |                              |                  |             | Czech Republic                           |                                                         |                                                                                            |
| Martina                                              | Sterclova         |                              |                  |             | Czech Republic                           |                                                         |                                                                                            |
| Elisabeth                                            | Bendstrup         |                              |                  |             | Denmark                                  |                                                         |                                                                                            |
| Saher B.                                             | Shaker            |                              |                  |             | Denmark                                  |                                                         |                                                                                            |
| Ingrid                                               | Titlestad         |                              |                  |             | Denmark                                  |                                                         |                                                                                            |

## Supplemental Online Content: Nonauthor Collaborators

\*First name, last name, and suffix (if applicable) are required and will appear in PubMed.

| *First Name and Middle Initial(s) | *Last Name          | *Suffix (eg, Jr, III) | Academic Degrees | Institution | Location (city, state/province, country) | Role or Contribution, eg, chair, principal investigator | Group (if more than 1 Group listed in the byline) and/or Subgroup (eg, Steering Committee) |
|-----------------------------------|---------------------|-----------------------|------------------|-------------|------------------------------------------|---------------------------------------------------------|--------------------------------------------------------------------------------------------|
| Stephan                           | Budweiser           |                       |                  |             | Germany                                  |                                                         |                                                                                            |
| Christian                         | Grohé               |                       |                  |             | Germany                                  |                                                         |                                                                                            |
| Dirk                              | Koschel             |                       |                  |             | Germany                                  |                                                         |                                                                                            |
| Michael                           | Kreuter             |                       |                  |             | Germany                                  |                                                         |                                                                                            |
| Antje                             | Prasse              |                       |                  |             | Germany                                  |                                                         |                                                                                            |
| Michael                           | Weber               |                       |                  |             | Germany                                  |                                                         |                                                                                            |
| Hubert                            | Wirtz               |                       |                  |             | Germany                                  |                                                         |                                                                                            |
| Katerina                          | Antoniou            |                       |                  |             | Greece                                   |                                                         |                                                                                            |
| Zoe                               | Daniil              |                       |                  |             | Greece                                   |                                                         |                                                                                            |
| Mina                              | Gaga                |                       |                  |             | Greece                                   |                                                         |                                                                                            |
| Despoina                          | Papakosta           |                       |                  |             | Greece                                   |                                                         |                                                                                            |
| Shinyu                            | Izumi               |                       |                  |             | Japan                                    |                                                         |                                                                                            |
| Masaki                            | Okamoto             |                       |                  |             | Japan                                    |                                                         |                                                                                            |
| Alfredo                           | Guerreros Benavides |                       |                  |             | Peru                                     |                                                         |                                                                                            |
| Carlos                            | Iberico Barrera     |                       |                  |             | Peru                                     |                                                         |                                                                                            |
| Alejandro Manuel                  | Peña Villalobos     |                       |                  |             | Peru                                     |                                                         |                                                                                            |
| Aranzazu                          | Campo Ezquibela     |                       |                  |             | Spain                                    |                                                         |                                                                                            |
| Jose Manuel                       | Cifrian Martinez    |                       |                  |             | Spain                                    |                                                         |                                                                                            |
| Estrella                          | Fernandez Fabrellas |                       |                  |             | Spain                                    |                                                         |                                                                                            |
| Virginia                          | Leiro               |                       |                  |             | Spain                                    |                                                         |                                                                                            |
| Maria                             | Molina-Molina       |                       |                  |             | Spain                                    |                                                         |                                                                                            |
| Asunción                          | Nieto Barbero       |                       |                  |             | Spain                                    |                                                         |                                                                                            |
| Jacobo                            | Sellares Torres     |                       |                  |             | Spain                                    |                                                         |                                                                                            |
| Claudia                           | Valenzuela          |                       |                  |             | Spain                                    |                                                         |                                                                                            |
| Shih-Lung                         | Cheng               |                       |                  |             | Taiwan                                   |                                                         |                                                                                            |
| Ping-Hung                         | Kuo                 |                       |                  |             | Taiwan                                   |                                                         |                                                                                            |
| Kang-Yun                          | Lee                 |                       |                  |             | Taiwan                                   |                                                         |                                                                                            |
| Chau-Chyun                        | Sheu                |                       |                  |             | Taiwan                                   |                                                         |                                                                                            |
| Hakan                             | Gunen               |                       |                  |             | Turkey                                   |                                                         |                                                                                            |
| Nesrin                            | Mogulkoc Bishop     |                       |                  |             | Turkey                                   |                                                         |                                                                                            |
| Sibel                             | Nayci               |                       |                  |             | Turkey                                   |                                                         |                                                                                            |

## Supplemental Online Content: Nonauthor Collaborators

\*First name, last name, and suffix (if applicable) are required and will appear in PubMed.

| *First Name and Middle Initial(s) | *Last Name      | *Suffix (eg, Jr, III) | Academic Degrees | Institution | Location (city, state/province, country) | Role or Contribution, eg, chair, principal investigator | Group (if more than 1 Group listed in the byline) and/or Subgroup (eg, Steering Committee) |
|-----------------------------------|-----------------|-----------------------|------------------|-------------|------------------------------------------|---------------------------------------------------------|--------------------------------------------------------------------------------------------|
| Huzaifa                           | Adamali         |                       |                  |             | United Kingdom                           |                                                         |                                                                                            |
| Stephen                           | Bianchi         |                       |                  |             | United Kingdom                           |                                                         |                                                                                            |
| Nazia                             | Chaudhuri       |                       |                  |             | United Kingdom                           |                                                         |                                                                                            |
| Michael                           | Gibbons         |                       |                  |             | United Kingdom                           |                                                         |                                                                                            |
| Simon                             | Hart            |                       |                  |             | United Kingdom                           |                                                         |                                                                                            |
| Philip                            | Molyneaux       |                       |                  |             | United Kingdom                           |                                                         |                                                                                            |
| Helen                             | Parfrey         |                       |                  |             | United Kingdom                           |                                                         |                                                                                            |
| Gauri                             | Saini           |                       |                  |             | United Kingdom                           |                                                         |                                                                                            |
| Lisa G                            | Spencer         |                       |                  |             | United Kingdom                           |                                                         |                                                                                            |
| Sarah                             | Wiscombe        |                       |                  |             | United Kingdom                           |                                                         |                                                                                            |
| Danielle                          | Antin-Ozerkis   |                       |                  |             | USA                                      |                                                         |                                                                                            |
| Rebecca                           | Bascom          |                       |                  |             | USA                                      |                                                         |                                                                                            |
| John                              | Belperio        |                       |                  |             | USA                                      |                                                         |                                                                                            |
| Edward                            | Britt           |                       |                  |             | USA                                      |                                                         |                                                                                            |
| John                              | Fitzgerald      |                       |                  |             | USA                                      |                                                         |                                                                                            |
| Diana                             | Gomez Manjarres |                       |                  |             | USA                                      |                                                         |                                                                                            |
| Mark                              | Gotfried        |                       |                  |             | USA                                      |                                                         |                                                                                            |
| Nishant                           | Gupta           |                       |                  |             | USA                                      |                                                         |                                                                                            |
| David                             | Hotchkin        |                       |                  |             | USA                                      |                                                         |                                                                                            |
| Mitchell                          | Kaye            |                       |                  |             | USA                                      |                                                         |                                                                                            |
| Mary                              | Kreider         |                       |                  |             | USA                                      |                                                         |                                                                                            |
| Shahrukh                          | Kureishy        |                       |                  |             | USA                                      |                                                         |                                                                                            |
| Peter                             | Lacamera        |                       |                  |             | USA                                      |                                                         |                                                                                            |
| Lisa                              | Lancaster       |                       |                  |             | USA                                      |                                                         |                                                                                            |
| Joseph                            | Lasky           |                       |                  |             | USA                                      |                                                         |                                                                                            |
| Daniel                            | Lorch           |                       |                  |             | USA                                      |                                                         |                                                                                            |
| Hannah                            | Mannem          |                       |                  |             | USA                                      |                                                         |                                                                                            |
| Lee                               | Morrow          |                       |                  |             | USA                                      |                                                         |                                                                                            |
| Teng                              | Moua            |                       |                  |             | USA                                      |                                                         |                                                                                            |
| Anoop                             | Nambiar         |                       |                  |             | USA                                      |                                                         |                                                                                            |
| Ganesh                            | Raghu           |                       |                  |             | USA                                      |                                                         |                                                                                            |

## Supplemental Online Content: Nonauthor Collaborators

\*First name, last name, and suffix (if applicable) are required and will appear in PubMed.

| *First Name and Middle Initial(s) | *Last Name        | *Suffix (eg, Jr, III) | Academic Degrees | Institution | Location (city, state/province, country) | Role or Contribution, eg, chair, principal investigator | Group (if more than 1 Group listed in the byline) and/or Subgroup (eg, Steering Committee) |
|-----------------------------------|-------------------|-----------------------|------------------|-------------|------------------------------------------|---------------------------------------------------------|--------------------------------------------------------------------------------------------|
| Rishi                             | Raj               |                       |                  |             | USA                                      |                                                         |                                                                                            |
| Murali                            | Ramaswamy         |                       |                  |             | USA                                      |                                                         |                                                                                            |
| Raghu                             | Reddy             |                       |                  |             | USA                                      |                                                         |                                                                                            |
| Tonya                             | Russell           |                       |                  |             | USA                                      |                                                         |                                                                                            |
| Mary Beth                         | Scholand          |                       |                  |             | USA                                      |                                                         |                                                                                            |
| Barry                             | Shea              |                       |                  |             | USA                                      |                                                         |                                                                                            |
| Sally                             | Suliman           |                       |                  |             | USA                                      |                                                         |                                                                                            |
| Jeff                              | Swigris           |                       |                  |             | USA                                      |                                                         |                                                                                            |
| Krishna                           | Thavarajah        |                       |                  |             | USA                                      |                                                         |                                                                                            |
| Leslie                            | Tolle             |                       |                  |             | USA                                      |                                                         |                                                                                            |
| Rade                              | Tomic             |                       |                  |             | USA                                      |                                                         |                                                                                            |
| Neal                              | Warshoff          |                       |                  |             | USA                                      |                                                         |                                                                                            |
| Lewis                             | Wesselius         |                       |                  |             | USA                                      |                                                         |                                                                                            |
| Gordon                            | Yung              |                       |                  |             | USA                                      |                                                         |                                                                                            |
| Miguel                            | Bergna            |                       |                  |             | Argentina                                |                                                         |                                                                                            |
| María                             | De Salvo          |                       |                  |             | Argentina                                |                                                         |                                                                                            |
| Mariano                           | Fernandez Acquier |                       |                  |             | Argentina                                |                                                         |                                                                                            |
| Alicia                            | Rodriguez         |                       |                  |             | Argentina                                |                                                         |                                                                                            |
| Pablo                             | Saez Scherbovsky  |                       |                  |             | Argentina                                |                                                         |                                                                                            |
| Deborah                           | Assayag           |                       |                  |             | Canada                                   |                                                         |                                                                                            |
| Anil                              | Dhar              |                       |                  |             | Canada                                   |                                                         |                                                                                            |
| Nasreen                           | Khalil            |                       |                  |             | Canada                                   |                                                         |                                                                                            |
| Julie                             | Morisset          |                       |                  |             | Canada                                   |                                                         |                                                                                            |
| Steeve                            | Provencher        |                       |                  |             | Canada                                   |                                                         |                                                                                            |
| Chris                             | Ryerson           |                       |                  |             | Canada                                   |                                                         |                                                                                            |
| Shane                             | Shapera           |                       |                  |             | Canada                                   |                                                         |                                                                                            |
| Arnaud                            | Bourdin           |                       |                  |             | France                                   |                                                         |                                                                                            |
| Bruno                             | Crestani          |                       |                  |             | France                                   |                                                         |                                                                                            |
| Francois                          | Lebargy           |                       |                  |             | France                                   |                                                         |                                                                                            |
| Martine                           | Reynaud-Gaubert   |                       |                  |             | France                                   |                                                         |                                                                                            |
| Francesco Tommas                  | Bonella           |                       |                  |             | Germany                                  |                                                         |                                                                                            |

## Supplemental Online Content: Nonauthor Collaborators

\*First name, last name, and suffix (if applicable) are required and will appear in PubMed.

| *First Name and Middle Initial(s) | *Last Name    | *Suffix (eg, Jr, III) | Academic Degrees | Institution | Location (city, state/province, country) | Role or Contribution, eg, chair, principal investigator | Group (if more than 1 Group listed in the byline) and/or Subgroup (eg, Steering Committee) |
|-----------------------------------|---------------|-----------------------|------------------|-------------|------------------------------------------|---------------------------------------------------------|--------------------------------------------------------------------------------------------|
| Martin                            | Claussen      |                       |                  |             | Germany                                  |                                                         |                                                                                            |
| Peter                             | Hammerl       |                       |                  |             | Germany                                  |                                                         |                                                                                            |
| Christian                         | Karagiannidis |                       |                  |             | Germany                                  |                                                         |                                                                                            |
| Claus                             | Keller        |                       |                  |             | Germany                                  |                                                         |                                                                                            |
| Winfried                          | Randerath     |                       |                  |             | Germany                                  |                                                         |                                                                                            |
| Beate                             | Stubbe        |                       |                  |             | Germany                                  |                                                         |                                                                                            |
| Eszter                            | Csánky        |                       |                  |             | Hungary                                  |                                                         |                                                                                            |
| Balazs                            | Medgyasszay   |                       |                  |             | Hungary                                  |                                                         |                                                                                            |
| Veronika                          | Muller        |                       |                  |             | Hungary                                  |                                                         |                                                                                            |
| Yochai                            | Adir          |                       |                  |             | Israel                                   |                                                         |                                                                                            |
| Amir                              | Bar-Shai      |                       |                  |             | Israel                                   |                                                         |                                                                                            |
| Neville                           | Berkman       |                       |                  |             | Israel                                   |                                                         |                                                                                            |
| Gershon                           | Fink          |                       |                  |             | Israel                                   |                                                         |                                                                                            |
| Mordechai                         | Kramer        |                       |                  |             | Israel                                   |                                                         |                                                                                            |
| David                             | Shitrit       |                       |                  |             | Israel                                   |                                                         |                                                                                            |
| Elena                             | Bargagli      |                       |                  |             | Italy                                    |                                                         |                                                                                            |
| Stefano                           | Gasparini     |                       |                  |             | Italy                                    |                                                         |                                                                                            |
| Sergio                            | Harari        |                       |                  |             | Italy                                    |                                                         |                                                                                            |
| Claudia                           | Ravaglia      |                       |                  |             | Italy                                    |                                                         |                                                                                            |
| Luca                              | Richeldi      |                       |                  |             | Italy                                    |                                                         |                                                                                            |
| Carlo                             | Vancheri      |                       |                  |             | Italy                                    |                                                         |                                                                                            |
| Masahito                          | Ebina         |                       |                  |             | Japan                                    |                                                         |                                                                                            |
| Masaki                            | Fujita        |                       |                  |             | Japan                                    |                                                         |                                                                                            |
| Kazuya                            | Ichikado      |                       |                  |             | Japan                                    |                                                         |                                                                                            |
| Yoshikazu                         | Inoue         |                       |                  |             | Japan                                    |                                                         |                                                                                            |
| Nobuhisa                          | Ishikawa      |                       |                  |             | Japan                                    |                                                         |                                                                                            |
| Shinyu                            | Izumi         |                       |                  |             | Japan                                    |                                                         |                                                                                            |
| Motoyasu                          | Kato          |                       |                  |             | Japan                                    |                                                         |                                                                                            |
| Tetsuji                           | Kawamura      |                       |                  |             | Japan                                    |                                                         |                                                                                            |
| Yasuhiro                          | Kondoh        |                       |                  |             | Japan                                    |                                                         |                                                                                            |
| Yasuhiko                          | Nishioka      |                       |                  |             | Japan                                    |                                                         |                                                                                            |

## Supplemental Online Content: Nonauthor Collaborators

\*First name, last name, and suffix (if applicable) are required and will appear in PubMed.

| *First Name and Middle Initial(s) | *Last Name         | *Suffix (eg, Jr, III) | Academic Degrees | Institution | Location (city, state/province, country) | Role or Contribution, eg, chair, principal investigator | Group (if more than 1 Group listed in the byline) and/or Subgroup (eg, Steering Committee) |
|-----------------------------------|--------------------|-----------------------|------------------|-------------|------------------------------------------|---------------------------------------------------------|--------------------------------------------------------------------------------------------|
| Takashi                           | Ogura              |                       |                  |             | Japan                                    |                                                         |                                                                                            |
| Masaki                            | Okamoto            |                       |                  |             | Japan                                    |                                                         |                                                                                            |
| Isoko                             | Owan               |                       |                  |             | Japan                                    |                                                         |                                                                                            |
| Takefumi                          | Saito              |                       |                  |             | Japan                                    |                                                         |                                                                                            |
| Noriho                            | Sakamoto           |                       |                  |             | Japan                                    |                                                         |                                                                                            |
| Koji                              | Sakamoto           |                       |                  |             | Japan                                    |                                                         |                                                                                            |
| Masahiro                          | Shirai             |                       |                  |             | Japan                                    |                                                         |                                                                                            |
| Takafumi                          | Suda               |                       |                  |             | Japan                                    |                                                         |                                                                                            |
| Keisuke                           | Tomii              |                       |                  |             | Japan                                    |                                                         |                                                                                            |
| Man Pyo                           | Chung              |                       |                  |             | Korea, Republic of                       |                                                         |                                                                                            |
| Sung Hwan                         | Jeong              |                       |                  |             | Korea, Republic of                       |                                                         |                                                                                            |
| Choon Sik                         | Park               |                       |                  |             | Korea, Republic of                       |                                                         |                                                                                            |
| Jong Sun                          | Park               |                       |                  |             | Korea, Republic of                       |                                                         |                                                                                            |
| Jin Woo                           | Song               |                       |                  |             | Korea, Republic of                       |                                                         |                                                                                            |
| Soo-Taek                          | Uh                 |                       |                  |             | Korea, Republic of                       |                                                         |                                                                                            |
| Uriel                             | Chavarria Martinez |                       |                  |             | Mexico                                   |                                                         |                                                                                            |
| Efrain                            | Montano Gonzalez   |                       |                  |             | Mexico                                   |                                                         |                                                                                            |
| Alicia                            | Ramirez            |                       |                  |             | Mexico                                   |                                                         |                                                                                            |
| Moises Eduardo                    | Selman Lama        |                       |                  |             | Mexico                                   |                                                         |                                                                                            |
| Paul                              | Bresser            |                       |                  |             | Netherlands                              |                                                         |                                                                                            |
| Henk                              | Kramer             |                       |                  |             | Netherlands                              |                                                         |                                                                                            |
| Remy                              | Mostard            |                       |                  |             | Netherlands                              |                                                         |                                                                                            |
| Esther                            | Nossent            |                       |                  |             | Netherlands                              |                                                         |                                                                                            |
| Marcel                            | Veltkamp           |                       |                  |             | Netherlands                              |                                                         |                                                                                            |
| Marlies                           | Wijsenbeek         |                       |                  |             | Netherlands                              |                                                         |                                                                                            |
| Lutz                              | Beckert            |                       |                  |             | New Zealand                              |                                                         |                                                                                            |
| Catherina L                       | Chang              |                       |                  |             | New Zealand                              |                                                         |                                                                                            |
| Andrew                            | Veale              |                       |                  |             | New Zealand                              |                                                         |                                                                                            |
| Margaret                          | Wilsher            |                       |                  |             | New Zealand                              |                                                         |                                                                                            |
| Michal                            | Bednarek           |                       |                  |             | Poland                                   |                                                         |                                                                                            |
| Grzegorz                          | Gasior             |                       |                  |             | Poland                                   |                                                         |                                                                                            |

## Supplemental Online Content: Nonauthor Collaborators

\*First name, last name, and suffix (if applicable) are required and will appear in PubMed.

| *First Name and Middle Initial(s) | *Last Name      | *Suffix (eg, Jr, III) | Academic Degrees | Institution | Location (city, state/province, country) | Role or Contribution, eg, chair, principal investigator | Group (if more than 1 Group listed in the byline) and/or Subgroup (eg, Steering Committee) |
|-----------------------------------|-----------------|-----------------------|------------------|-------------|------------------------------------------|---------------------------------------------------------|--------------------------------------------------------------------------------------------|
| Grazyna                           | Jasieniak-Pinis |                       |                  |             | Poland                                   |                                                         |                                                                                            |
| Ewa                               | Jassem          |                       |                  |             | Poland                                   |                                                         |                                                                                            |
| Robert                            | Mroz            |                       |                  |             | Poland                                   |                                                         |                                                                                            |
| Wojciech                          | Piotrowski      |                       |                  |             | Poland                                   |                                                         |                                                                                            |
| Ismail                            | Abdullah        |                       |                  |             | South Africa                             |                                                         |                                                                                            |
| Anish                             | Ambaram         |                       |                  |             | South Africa                             |                                                         |                                                                                            |
| Elvis                             | Irusen          |                       |                  |             | South Africa                             |                                                         |                                                                                            |
| Michael                           | Van der Linden  |                       |                  |             | South Africa                             |                                                         |                                                                                            |
| Richard                           | van Zyl-Smit    |                       |                  |             | South Africa                             |                                                         |                                                                                            |
| Paul                              | Williams        |                       |                  |             | South Africa                             |                                                         |                                                                                            |
| James                             | Allen           |                       |                  |             | USA                                      |                                                         |                                                                                            |
| Francis                           | Averill         |                       |                  |             | USA                                      |                                                         |                                                                                            |
| Elizabeth                         | Belloli         |                       |                  |             | USA                                      |                                                         |                                                                                            |
| Anne                              | Brown           |                       |                  |             | USA                                      |                                                         |                                                                                            |
| Amy                               | Case            |                       |                  |             | USA                                      |                                                         |                                                                                            |
| Sachin                            | Chaudhary       |                       |                  |             | USA                                      |                                                         |                                                                                            |
| Gerard                            | Criner          |                       |                  |             | USA                                      |                                                         |                                                                                            |
| Kevin                             | DeBoer          |                       |                  |             | USA                                      |                                                         |                                                                                            |
| Daniel                            | Dilling         |                       |                  |             | USA                                      |                                                         |                                                                                            |
| Jeffrey                           | Dorf            |                       |                  |             | USA                                      |                                                         |                                                                                            |
| Richard                           | Enelow          |                       |                  |             | USA                                      |                                                         |                                                                                            |
| Neil                              | Ettinger        |                       |                  |             | USA                                      |                                                         |                                                                                            |
| Jeremy                            | Feldman         |                       |                  |             | USA                                      |                                                         |                                                                                            |
| Kevin                             | Gibson          |                       |                  |             | USA                                      |                                                         |                                                                                            |
| Jeffrey                           | Golden          |                       |                  |             | USA                                      |                                                         |                                                                                            |
| Mark                              | Hamblin         |                       |                  |             | USA                                      |                                                         |                                                                                            |
| Gary                              | Hunninghake     |                       |                  |             | USA                                      |                                                         |                                                                                            |
| Raj                               | Karunakara      |                       |                  |             | USA                                      |                                                         |                                                                                            |
| Hyun                              | Kim             |                       |                  |             | USA                                      |                                                         |                                                                                            |
| Tracy                             | Luckhardt       |                       |                  |             | USA                                      |                                                         |                                                                                            |
| Prema                             | Menon           |                       |                  |             | USA                                      |                                                         |                                                                                            |

Supplemental Online Content: Nonauthor Collaborators

\*First name, last name, and suffix (if applicable) are required and will appear in PubMed.

| *First Name and Middle Initial(s) | *Last Name    | *Suffix (eg, Jr, III) | Academic Degrees | Institution | Location (city, state/province, country) | Role or Contribution, eg, chair, principal investigator | Group (if more than 1 Group listed in the byline) and/or Subgroup (eg, Steering Committee) |
|-----------------------------------|---------------|-----------------------|------------------|-------------|------------------------------------------|---------------------------------------------------------|--------------------------------------------------------------------------------------------|
| Lake                              | Morrison      |                       |                  |             | USA                                      |                                                         |                                                                                            |
| Justin                            | Oldham        |                       |                  |             | USA                                      |                                                         |                                                                                            |
| Nina                              | Patel         |                       |                  |             | USA                                      |                                                         |                                                                                            |
| Shelley                           | Schmidt       |                       |                  |             | USA                                      |                                                         |                                                                                            |
| Mary                              | Strek         |                       |                  |             | USA                                      |                                                         |                                                                                            |
| Ross                              | Summer        |                       |                  |             | USA                                      |                                                         |                                                                                            |
| Robert                            | Sussman       |                       |                  |             | USA                                      |                                                         |                                                                                            |
| James                             | Tita          |                       |                  |             | USA                                      |                                                         |                                                                                            |
| Srihari                           | Veeraraghavan |                       |                  |             | USA                                      |                                                         |                                                                                            |
| Timothy                           | Whelan        |                       |                  |             | USA                                      |                                                         |                                                                                            |
| Joseph                            | Zibrak        |                       |                  |             | USA                                      |                                                         |                                                                                            |
