# Supplementary material
Source: PubMed Central journal article supplement (PMC10170340)
Supplement: jama-e235355-s005.pdf [file jama-e235355-s005.pdf]

## Data Sharing Statement

Maier. Ziritaxestat, a Novel Autotaxin Inhibitor, and Lung Function in Idiopathic Pulmonary Fibrosis. *JAMA*. Published May 09, 2023. doi:10.1001/jama.2023.5355

### Data

**Data available:** No

### Additional Information

**Explanation for why data not available:** Data will not be made available as informed consent was not obtained for the sharing of individual patient data.
